# Supplementary material for: Multiple Introductions of SARS-CoV-2 Alpha and Delta Variants into White-Tailed Deer in Pennsylvania
Source: bioRxiv or medRxiv preprint supplement (doi:10.1101/2022.02.17.22270679), 2022-05-13
Supplement: Supplementary file [file media-1.pdf]

Table S7. Human sequences used

| VSP     | Lineage | GISAID Accession number     | NCBI Accession |
|---------|---------|-----------------------------|----------------|
| VSP0563 | B.1.1.7 | hCoV-19/USA/VSP0563/2021    | OK245616       |
| VSP0623 | B.1.1.7 | hCoV-19/USA/VSP0623/2021    | OK245640       |
| VSP0625 | B.1.1.7 | hCoV-19/USA/VSP0625/2021    | OK245641       |
| VSP0654 | B.1.1.7 | hCoV-19/USA/VSP0654/2020    | OK245656       |
| VSP0674 | B.1.1.7 | hCoV-19/USA/PA-VSP0674/2021 | OK245673       |
| VSP0702 | B.1.1.7 | hCoV-19/USA/PA-VSP0702/2021 | OK245689       |
| VSP0711 | B.1.1.7 | hCoV-19/USA/PA-VSP0711/2021 | OK245694       |
| VSP0790 | B.1.1.7 | hCoV-19/USA/PA-VSP0790/2021 | OK245713       |
| VSP0805 | B.1.1.7 | hCoV-19/USA/VSP0805/2021    | OK245717       |
| VSP0811 | B.1.1.7 | hCoV-19/USA/VSP0811/2021    | OK245721       |
| VSP0812 | B.1.1.7 | hCoV-19/USA/VSP0812/2021    | OK245722       |
| VSP0813 | B.1.1.7 | hCoV-19/USA/VSP0813/2021    | OK245723       |
| VSP0814 | B.1.1.7 | hCoV-19/USA/VSP0814/2021    | OK245724       |
| VSP0815 | B.1.1.7 | hCoV-19/USA/VSP0815/2021    | OK245725       |
| VSP0868 | B.1.1.7 | hCoV-19/USA/VSP0868/2021    | OK245747       |
| VSP0869 | B.1.1.7 | hCoV-19/USA/VSP0869/2021    | OK245748       |
| VSP0870 | B.1.1.7 | hCoV-19/USA/VSP0870/2021    | OK245749       |
| VSP0871 | B.1.1.7 | hCoV-19/USA/VSP0871/2021    | OK245750       |
| VSP0872 | B.1.1.7 | hCoV-19/USA/VSP0872/2021    | OK245751       |
| VSP0873 | B.1.1.7 | hCoV-19/USA/VSP0873/2021    | OK245752       |
| VSP0879 | B.1.1.7 | hCoV-19/USA/PA-VSP0879/2021 | OK245754       |
| VSP0880 | B.1.1.7 | hCoV-19/USA/PA-VSP0880/2021 | OK245755       |
| VSP0882 | B.1.1.7 | hCoV-19/USA/NJ-VSP0882/2021 | OK245757       |
| VSP0884 | B.1.1.7 | hCoV-19/USA/PA-VSP0884/2021 | OK245758       |
| VSP0885 | B.1.1.7 | hCoV-19/USA/PA-VSP0885/2021 | OK245759       |
| VSP0886 | B.1.1.7 | hCoV-19/USA/PA-VSP0886/2021 | OK245760       |
| VSP0887 | B.1.1.7 | hCoV-19/USA/PA-VSP0887/2021 | OK245761       |
| VSP0888 | B.1.1.7 | hCoV-19/USA/PA-VSP0888/2021 | OK245762       |
| VSP0890 | B.1.1.7 | hCoV-19/USA/PA-VSP0890/2021 | OK245764       |
| VSP0891 | B.1.1.7 | hCoV-19/USA/PA-VSP0891/2021 | OK245765       |
| VSP0892 | B.1.1.7 | hCoV-19/USA/PA-VSP0892/2021 | OK245766       |
| VSP0893 | B.1.1.7 | hCoV-19/USA/NJ-VSP0893/2021 | OK245767       |
| VSP0894 | B.1.1.7 | hCoV-19/USA/NJ-VSP0894/2021 | OK245768       |
| VSP0895 | B.1.1.7 | hCoV-19/USA/DE-VSP0895/2021 | OK245769       |
| VSP0896 | B.1.1.7 | hCoV-19/USA/PA-VSP0896/2021 | OK245770       |
| VSP0897 | B.1.1.7 | hCoV-19/USA/PA-VSP0897/2021 | OK245771       |
| VSP0935 | B.1.1.7 | hCoV-19/USA/VSP0935/2021    | MW881991       |
| VSP0942 | B.1.1.7 | hCoV-19/USA/VSP0942/2021    | MW881997       |
| VSP0989 | B.1.1.7 | hCoV-19/USA/VSP0989/2021    | MW882028       |
| VSP0990 | B.1.1.7 | hCoV-19/USA/VSP0990/2021    | MW882029       |
| VSP1012 | B.1.1.7 | hCoV-19/USA/VSP1012/2021    | MW882049       |
| VSP1022 | B.1.1.7 | hCoV-19/USA/VSP1022/2021    | MW882059       |
| VSP1025 | B.1.1.7 | hCoV-19/USA/VSP1025/2021    | MW882062       |
| VSP1029 | B.1.1.7 | hCoV-19/USA/VSP1029/2021    | MW935670       |
| VSP1031 | B.1.1.7 | hCoV-19/USA/VSP1031/2021    | MW935671       |
| VSP1033 | B.1.1.7 | hCoV-19/USA/PA-VSP1033/2021 |                |

|         |         |                             |          |
|---------|---------|-----------------------------|----------|
| VSP1034 | B.1.1.7 | hCoV-19/USA/PA-VSP1034/2021 | OK245783 |
| VSP1035 | B.1.1.7 | hCoV-19/USA/PA-VSP1035/2021 | OK245784 |
| VSP1036 | B.1.1.7 | hCoV-19/USA/PA-VSP1036/2021 | OK245785 |
| VSP1058 | B.1.1.7 | hCoV-19/USA/PA-VSP1058/2021 | OK245792 |
| VSP1068 | B.1.1.7 | hCoV-19/USA/PA-VSP1068/2021 | OK245795 |
| VSP1069 | B.1.1.7 | hCoV-19/USA/PA-VSP1069/2021 | OK245796 |
| VSP1070 | B.1.1.7 | hCoV-19/USA/PA-VSP1070/2021 | OK245797 |
| VSP1072 | B.1.1.7 | hCoV-19/USA/PA-VSP1072/2021 | OK245798 |
| VSP1073 | B.1.1.7 | hCoV-19/USA/PA-VSP1073/2021 | OK245799 |
| VSP1074 | B.1.1.7 | hCoV-19/USA/PA-VSP1074/2021 | OK245800 |
| VSP1075 | B.1.1.7 | hCoV-19/USA/NJ-VSP1075/2021 |          |
| VSP1076 | B.1.1.7 | hCoV-19/USA/PA-VSP1076/2021 | OK245801 |
| VSP1078 | B.1.1.7 | hCoV-19/USA/PA-VSP1078/2021 | OK245802 |
| VSP1080 | B.1.1.7 | hCoV-19/USA/PA-VSP1080/2021 | OK245803 |
| VSP1081 | B.1.1.7 | hCoV-19/USA/PA-VSP1081/2021 | OK245804 |
| VSP1083 | B.1.1.7 | hCoV-19/USA/NJ-VSP1083/2021 | OK245805 |
| VSP1084 | B.1.1.7 | hCoV-19/USA/PA-VSP1084/2021 | OK245806 |
| VSP1085 | B.1.1.7 | hCoV-19/USA/PA-VSP1085/2021 | OK245807 |
| VSP1094 | B.1.1.7 | hCoV-19/USA/VSP1094/2021    | MW935675 |
| VSP1095 | B.1.1.7 | hCoV-19/USA/VSP1095/2021    | MW935676 |
| VSP1096 | B.1.1.7 | hCoV-19/USA/VSP1096/2021    | MW935677 |
| VSP1107 | B.1.1.7 | hCoV-19/USA/VSP1107/2021    | MW935687 |
| VSP1110 | B.1.1.7 | hCoV-19/USA/VSP1110/2021    | MW935689 |
| VSP1111 | B.1.1.7 | hCoV-19/USA/VSP1111/2021    | MW935690 |
| VSP1138 | B.1.1.7 | hCoV-19/USA/VSP1138/2021    | OK245810 |
| VSP1139 | B.1.1.7 | hCoV-19/USA/VSP1139/2021    | MW935715 |
| VSP1154 | B.1.1.7 | hCoV-19/USA/VSP1154/2021    | MW935727 |
| VSP1162 | B.1.1.7 | hCoV-19/USA/VSP1162/2021    | MW935735 |
| VSP1164 | B.1.1.7 | hCoV-19/USA/VSP1164/2021    | MW935736 |
| VSP1166 | B.1.1.7 | hCoV-19/USA/PA-VSP1166/2021 | OK245813 |
| VSP1173 | B.1.1.7 | hCoV-19/USA/PA-VSP1173/2021 | OK245817 |
| VSP1212 | B.1.1.7 | hCoV-19/USA/PA-VSP1212/2021 | OK245845 |
| VSP1218 | B.1.1.7 | hCoV-19/USA/NJ-VSP1218/2021 | OK245847 |
| VSP1222 | B.1.1.7 | hCoV-19/USA/PA-VSP1222/2021 | OK245850 |
| VSP1223 | B.1.1.7 | hCoV-19/USA/PA-VSP1223/2021 | OK245851 |
| VSP1224 | B.1.1.7 | hCoV-19/USA/PA-VSP1224/2021 | OK245852 |
| VSP1226 | B.1.1.7 | hCoV-19/USA/PA-VSP1226/2021 | OK245853 |
| VSP1227 | B.1.1.7 | hCoV-19/USA/PA-VSP1227/2021 | OK245854 |
| VSP1228 | B.1.1.7 | hCoV-19/USA/PA-VSP1228/2021 | OK245855 |
| VSP1229 | B.1.1.7 | hCoV-19/USA/PA-VSP1229/2021 | OK245856 |
| VSP1230 | B.1.1.7 | hCoV-19/USA/PA-VSP1230/2021 | OK245857 |
| VSP1231 | B.1.1.7 | hCoV-19/USA/PA-VSP1231/2021 | OK245858 |
| VSP1232 | B.1.1.7 | hCoV-19/USA/PA-VSP1232/2021 | OK245859 |
| VSP1233 | B.1.1.7 | hCoV-19/USA/PA-VSP1233/2021 | OK245860 |
| VSP1236 | B.1.1.7 | hCoV-19/USA/NJ-VSP1236/2021 | OK245861 |
| VSP1237 | B.1.1.7 | hCoV-19/USA/PA-VSP1237/2021 | OK245862 |
| VSP1238 | B.1.1.7 | hCoV-19/USA/PA-VSP1238/2021 | OK245863 |
| VSP1240 | B.1.1.7 | hCoV-19/USA/PA-VSP1240/2021 | OK245865 |

|         |         |                             |          |
|---------|---------|-----------------------------|----------|
| VSP1241 | B.1.1.7 | hCoV-19/USA/PA-VSP1241/2021 | OK245866 |
| VSP1242 | B.1.1.7 | hCoV-19/USA/PA-VSP1242/2021 | OK245867 |
| VSP1243 | B.1.1.7 | hCoV-19/USA/PA-VSP1243/2021 | OK245868 |
| VSP1244 | B.1.1.7 | hCoV-19/USA/NY-VSP1244/2021 | OK245869 |
| VSP1245 | B.1.1.7 | hCoV-19/USA/PA-VSP1245/2021 | OK245870 |
| VSP1246 | B.1.1.7 | hCoV-19/USA/PA-VSP1246/2021 | OK245871 |
| VSP1247 | B.1.1.7 | hCoV-19/USA/PA-VSP1247/2021 | OK245872 |
| VSP1248 | B.1.1.7 | hCoV-19/USA/PA-VSP1248/2021 | OK245873 |
| VSP1249 | B.1.1.7 | hCoV-19/USA/PA-VSP1249/2021 |          |
| VSP1250 | B.1.1.7 | hCoV-19/USA/PA-VSP1250/2021 | OK245874 |
| VSP1251 | B.1.1.7 | hCoV-19/USA/PA-VSP1251/2021 | OK245875 |
| VSP1252 | B.1.1.7 | hCoV-19/USA/PA-VSP1252/2021 | OK245876 |
| VSP1253 | B.1.1.7 | hCoV-19/USA/PA-VSP1253/2021 | OK245877 |
| VSP1254 | B.1.1.7 | hCoV-19/USA/PA-VSP1254/2021 | OK245878 |
| VSP1255 | B.1.1.7 | hCoV-19/USA/PA-VSP1255/2021 | OK245879 |
| VSP1256 | B.1.1.7 | hCoV-19/USA/PA-VSP1256/2021 | OK245880 |
| VSP1257 | B.1.1.7 | hCoV-19/USA/PA-VSP1257/2021 | OK245881 |
| VSP1258 | B.1.1.7 | hCoV-19/USA/PA-VSP1258/2021 | OK245882 |
| VSP1259 | B.1.1.7 | hCoV-19/USA/NJ-VSP1259/2021 | OK245883 |
| VSP1260 | B.1.1.7 | hCoV-19/USA/PA-VSP1260/2021 | OK245884 |
| VSP1262 | B.1.1.7 | hCoV-19/USA/PA-VSP1262/2021 | OK245885 |
| VSP1263 | B.1.1.7 | hCoV-19/USA/NJ-VSP1263/2021 | OK245886 |
| VSP1268 | B.1.1.7 | hCoV-19/USA/PA-VSP1268/2021 | OK245887 |
| VSP1269 | B.1.1.7 | hCoV-19/USA/PA-VSP1269/2021 | OK245888 |
| VSP1270 | B.1.1.7 | hCoV-19/USA/PA-VSP1270/2021 | OK245889 |
| VSP1271 | B.1.1.7 | hCoV-19/USA/PA-VSP1271/2021 | OK245890 |
| VSP1281 | B.1.1.7 | hCoV-19/USA/PA-VSP1281/2021 | OK245899 |
| VSP1283 | B.1.1.7 | hCoV-19/USA/PA-VSP1283/2021 | OK245900 |
| VSP1284 | B.1.1.7 | hCoV-19/USA/PA-VSP1284/2021 | OK245901 |
| VSP1285 | B.1.1.7 | hCoV-19/USA/PA-VSP1285/2021 | OK245902 |
| VSP1293 | B.1.1.7 | hCoV-19/USA/PA-VSP1293/2021 | OK245910 |
| VSP1295 | B.1.1.7 | hCoV-19/USA/PA-VSP1295/2021 | OK245912 |
| VSP1301 | B.1.1.7 | hCoV-19/USA/PA-VSP1301/2021 | OK245917 |
| VSP1334 | B.1.1.7 | hCoV-19/USA/VSP1334/2021    | MW935756 |
| VSP1337 | B.1.1.7 | hCoV-19/USA/VSP1337/2021    | MW935758 |
| VSP1338 | B.1.1.7 | hCoV-19/USA/VSP1338/2021    | MW935759 |
| VSP1339 | B.1.1.7 | hCoV-19/USA/VSP1339/2021    | MW935760 |
| VSP1340 | B.1.1.7 | hCoV-19/USA/VSP1340/2021    | MW935761 |
| VSP1346 | B.1.1.7 | hCoV-19/USA/VSP1346/2021    | MW935767 |
| VSP1368 | B.1.1.7 | hCoV-19/USA/VSP1368/2021    | MW935785 |
| VSP1372 | B.1.1.7 | hCoV-19/USA/VSP1372/2021    | OK245925 |
| VSP1374 | B.1.1.7 | hCoV-19/USA/VSP1374/2021    | MW935790 |
| VSP1376 | B.1.1.7 | hCoV-19/USA/VSP1376/2021    | MW935792 |
| VSP1377 | B.1.1.7 | hCoV-19/USA/VSP1377/2021    | MW935793 |
| VSP1378 | B.1.1.7 | hCoV-19/USA/VSP1378/2021    | MW935794 |
| VSP1379 | B.1.1.7 | hCoV-19/USA/VSP1379/2021    | MW935795 |
| VSP1380 | B.1.1.7 | hCoV-19/USA/VSP1380/2021    | MW935796 |
| VSP1382 | B.1.1.7 | hCoV-19/USA/VSP1382/2021    | MW935798 |

|         |         |                             |          |
|---------|---------|-----------------------------|----------|
| VSP1391 | B.1.1.7 | hCoV-19/USA/VSP1391/2021    | MW935806 |
| VSP1398 | B.1.1.7 | hCoV-19/USA/VSP1398/2021    | MW935809 |
| VSP1402 | B.1.1.7 | hCoV-19/USA/VSP1402/2021    | MW935811 |
| VSP1421 | B.1.1.7 | hCoV-19/USA/VSP1421/2021    | MW935818 |
| VSP1439 | B.1.1.7 | hCoV-19/USA/PA-VSP1439/2021 | OK245928 |
| VSP1447 | B.1.1.7 | hCoV-19/USA/NJ-VSP1447/2021 | MZ156591 |
| VSP1453 | B.1.1.7 | hCoV-19/USA/PA-VSP1453/2021 | MZ156592 |
| VSP1454 | B.1.1.7 | hCoV-19/USA/PA-VSP1454/2021 | MZ156593 |
| VSP1455 | B.1.1.7 | hCoV-19/USA/PA-VSP1455/2021 | OK245929 |
| VSP1456 | B.1.1.7 | hCoV-19/USA/PA-VSP1456/2021 | MZ156594 |
| VSP1458 | B.1.1.7 | hCoV-19/USA/PA-VSP1458/2021 | OK245930 |
| VSP1459 | B.1.1.7 | hCoV-19/USA/PA-VSP1459/2021 | MZ156595 |
| VSP1461 | B.1.1.7 | hCoV-19/USA/PA-VSP1461/2021 | MZ156596 |
| VSP1462 | B.1.1.7 | hCoV-19/USA/PA-VSP1462/2021 | MZ156597 |
| VSP1463 | B.1.1.7 | hCoV-19/USA/PA-VSP1463/2021 | MZ156598 |
| VSP1465 | B.1.1.7 | hCoV-19/USA/PA-VSP1465/2021 | OK245931 |
| VSP1467 | B.1.1.7 | hCoV-19/USA/PA-VSP1467/2021 | MZ156599 |
| VSP1468 | B.1.1.7 | hCoV-19/USA/PA-VSP1468/2021 | MZ156600 |
| VSP1469 | B.1.1.7 | hCoV-19/USA/PA-VSP1469/2021 | MZ156601 |
| VSP1470 | B.1.1.7 | hCoV-19/USA/PA-VSP1470/2021 | MZ156602 |
| VSP1472 | B.1.1.7 | hCoV-19/USA/PA-VSP1472/2021 | MZ156603 |
| VSP1473 | B.1.1.7 | hCoV-19/USA/PA-VSP1473/2021 | MZ156604 |
| VSP1474 | B.1.1.7 | hCoV-19/USA/PA-VSP1474/2021 | MZ156605 |
| VSP1475 | B.1.1.7 | hCoV-19/USA/PA-VSP1475/2021 | OK245932 |
| VSP1476 | B.1.1.7 | hCoV-19/USA/PA-VSP1476/2021 | MZ156606 |
| VSP1477 | B.1.1.7 | hCoV-19/USA/PA-VSP1477/2021 | MZ156607 |
| VSP1478 | B.1.1.7 | hCoV-19/USA/PA-VSP1478/2021 | MZ156608 |
| VSP1479 | B.1.1.7 | hCoV-19/USA/DE-VSP1479/2021 | MZ156609 |
| VSP1480 | B.1.1.7 | hCoV-19/USA/PA-VSP1480/2021 | MZ156610 |
| VSP1482 | B.1.1.7 | hCoV-19/USA/PA-VSP1482/2021 | OK245933 |
| VSP1483 | B.1.1.7 | hCoV-19/USA/PA-VSP1483/2021 | MZ156611 |
| VSP1484 | B.1.1.7 | hCoV-19/USA/PA-VSP1484/2021 | MZ156612 |
| VSP1485 | B.1.1.7 | hCoV-19/USA/PA-VSP1485/2021 | MZ156613 |
| VSP1486 | B.1.1.7 | hCoV-19/USA/PA-VSP1486/2021 | MZ156614 |
| VSP1487 | B.1.1.7 | hCoV-19/USA/PA-VSP1487/2021 | MZ156615 |
| VSP1488 | B.1.1.7 | hCoV-19/USA/PA-VSP1488/2021 | MZ156616 |
| VSP1489 | B.1.1.7 | hCoV-19/USA/PA-VSP1489/2021 | MZ156617 |
| VSP1490 | B.1.1.7 | hCoV-19/USA/PA-VSP1490/2021 | MZ156618 |
| VSP1491 | B.1.1.7 | hCoV-19/USA/PA-VSP1491/2021 | OK245934 |
| VSP1492 | B.1.1.7 | hCoV-19/USA/PA-VSP1492/2021 | OK245935 |
| VSP1493 | B.1.1.7 | hCoV-19/USA/PA-VSP1493/2021 | OK245936 |
| VSP1494 | B.1.1.7 | hCoV-19/USA/PA-VSP1494/2021 | MZ156619 |
| VSP1495 | B.1.1.7 | hCoV-19/USA/PA-VSP1495/2021 | MZ156620 |
| VSP1496 | B.1.1.7 | hCoV-19/USA/PA-VSP1496/2021 | MZ156621 |
| VSP1498 | B.1.1.7 | hCoV-19/USA/PA-VSP1498/2021 | OK245937 |
| VSP1499 | B.1.1.7 | hCoV-19/USA/PA-VSP1499/2021 | OK245938 |
| VSP1500 | B.1.1.7 | hCoV-19/USA/PA-VSP1500/2021 | MZ156622 |
| VSP1501 | B.1.1.7 | hCoV-19/USA/PA-VSP1501/2021 | MZ156623 |

|         |         |                             |          |
|---------|---------|-----------------------------|----------|
| VSP1502 | B.1.1.7 | hCoV-19/USA/PA-VSP1502/2021 | MZ156624 |
| VSP1503 | B.1.1.7 | hCoV-19/USA/PA-VSP1503/2021 | OK245939 |
| VSP1505 | B.1.1.7 | hCoV-19/USA/PA-VSP1505/2021 | MZ156625 |
| VSP1506 | B.1.1.7 | hCoV-19/USA/PA-VSP1506/2021 | MZ156626 |
| VSP1507 | B.1.1.7 | hCoV-19/USA/PA-VSP1507/2021 | MZ156627 |
| VSP1508 | B.1.1.7 | hCoV-19/USA/PA-VSP1508/2021 | MZ156628 |
| VSP1509 | B.1.1.7 | hCoV-19/USA/PA-VSP1509/2021 | MZ156629 |
| VSP1511 | B.1.1.7 | hCoV-19/USA/PA-VSP1511/2021 | MZ156631 |
| VSP1513 | B.1.1.7 | hCoV-19/USA/PA-VSP1513/2021 | MZ156632 |
| VSP1522 | B.1.1.7 | hCoV-19/USA/PA-VSP1522/2021 | MZ156640 |
| VSP1526 | B.1.1.7 | hCoV-19/USA/PA-VSP1526/2021 | MZ156643 |
| VSP1527 | B.1.1.7 | hCoV-19/USA/PA-VSP1527/2021 | MZ156644 |
| VSP1528 | B.1.1.7 | hCoV-19/USA/PA-VSP1528/2021 | MZ156645 |
| VSP1531 | B.1.1.7 | hCoV-19/USA/PA-VSP1531/2021 | MZ156648 |
| VSP1533 | B.1.1.7 | hCoV-19/USA/PA-VSP1533/2021 | MZ156650 |
| VSP1534 | B.1.1.7 | hCoV-19/USA/PA-VSP1534/2021 | MZ156651 |
| VSP1536 | B.1.1.7 | hCoV-19/USA/PA-VSP1536/2021 | MZ156652 |
| VSP1537 | B.1.1.7 | hCoV-19/USA/PA-VSP1537/2021 | MZ156653 |
| VSP1538 | B.1.1.7 | hCoV-19/USA/PA-VSP1538/2021 | MZ156654 |
| VSP1548 | B.1.1.7 | hCoV-19/USA/VSP1548/2021    | MZ512581 |
| VSP1552 | B.1.1.7 | hCoV-19/USA/VSP1552/2021    | MZ512585 |
| VSP1557 | B.1.1.7 | hCoV-19/USA/VSP1557/2021    | MZ512589 |
| VSP1559 | B.1.1.7 | hCoV-19/USA/VSP1559/2021    | MZ512591 |
| VSP1562 | B.1.1.7 | hCoV-19/USA/VSP1562/2021    | MZ512594 |
| VSP1567 | B.1.1.7 | hCoV-19/USA/VSP1567/2021    | MZ512599 |
| VSP1568 | B.1.1.7 | hCoV-19/USA/VSP1568/2021    | MZ512600 |
| VSP1569 | B.1.1.7 | hCoV-19/USA/VSP1569/2021    | MZ512601 |
| VSP1571 | B.1.1.7 | hCoV-19/USA/VSP1571/2021    | MZ512603 |
| VSP1573 | B.1.1.7 | hCoV-19/USA/VSP1573/2021    | MZ512605 |
| VSP1580 | B.1.1.7 | hCoV-19/USA/VSP1580/2021    | MZ512612 |
| VSP1583 | B.1.1.7 | hCoV-19/USA/VSP1583/2021    | MZ512615 |
| VSP1585 | B.1.1.7 | hCoV-19/USA/VSP1585/2021    | MZ512617 |
| VSP1590 | B.1.1.7 | hCoV-19/USA/VSP1590/2021    | MZ512622 |
| VSP1591 | B.1.1.7 | hCoV-19/USA/VSP1591/2021    | MZ512623 |
| VSP1596 | B.1.1.7 | hCoV-19/USA/VSP1596/2021    | MZ512627 |
| VSP1600 | B.1.1.7 | hCoV-19/USA/VSP1600/2021    | MZ512631 |
| VSP1602 | B.1.1.7 | hCoV-19/USA/VSP1602/2021    | MZ512633 |
| VSP1603 | B.1.1.7 | hCoV-19/USA/VSP1603/2021    | MZ512634 |
| VSP1605 | B.1.1.7 | hCoV-19/USA/VSP1605/2021    | MZ512636 |
| VSP1606 | B.1.1.7 | hCoV-19/USA/VSP1606/2021    | MZ512637 |
| VSP1612 | B.1.1.7 | hCoV-19/USA/VSP1612/2021    | MZ512642 |
| VSP1615 | B.1.1.7 | hCoV-19/USA/VSP1615/2021    | MZ512645 |
| VSP1620 | B.1.1.7 | hCoV-19/USA/VSP1620/2021    | MZ512650 |
| VSP1621 | B.1.1.7 | hCoV-19/USA/VSP1621/2021    | MZ512651 |
| VSP1622 | B.1.1.7 | hCoV-19/USA/VSP1622/2021    | MZ512652 |
| VSP1627 | B.1.1.7 | hCoV-19/USA/VSP1627/2021    | MZ512657 |
| VSP1628 | B.1.1.7 | hCoV-19/USA/VSP1628/2021    | MZ512658 |
| VSP1629 | B.1.1.7 | hCoV-19/USA/VSP1629/2021    | MZ512659 |

|         |         |                             |          |
|---------|---------|-----------------------------|----------|
| VSP1640 | B.1.1.7 | hCoV-19/USA/VSP1640/2021    | MZ512669 |
| VSP1646 | B.1.1.7 | hCoV-19/USA/VSP1646/2021    | MZ512675 |
| VSP1648 | B.1.1.7 | hCoV-19/USA/VSP1648/2021    | MZ512677 |
| VSP1649 | B.1.1.7 | hCoV-19/USA/VSP1649/2021    | MZ512678 |
| VSP1650 | B.1.1.7 | hCoV-19/USA/VSP1650/2021    | MZ512679 |
| VSP1657 | B.1.1.7 | hCoV-19/USA/VSP1657/2021    | MZ512686 |
| VSP1658 | B.1.1.7 | hCoV-19/USA/VSP1658/2021    | MZ512687 |
| VSP1662 | B.1.1.7 | hCoV-19/USA/VSP1662/2021    | MZ512691 |
| VSP1664 | B.1.1.7 | hCoV-19/USA/VSP1664/2021    | MZ512693 |
| VSP1668 | B.1.1.7 | hCoV-19/USA/VSP1668/2021    | MZ512697 |
| VSP1669 | B.1.1.7 | hCoV-19/USA/VSP1669/2021    | MZ512698 |
| VSP1670 | B.1.1.7 | hCoV-19/USA/VSP1670/2021    | MZ512699 |
| VSP1673 | B.1.1.7 | hCoV-19/USA/VSP1673/2021    | MZ512702 |
| VSP1683 | B.1.1.7 | hCoV-19/USA/VSP1683/2021    | MZ512711 |
| VSP1685 | B.1.1.7 | hCoV-19/USA/VSP1685/2021    | MZ512713 |
| VSP1686 | B.1.1.7 | hCoV-19/USA/VSP1686/2021    | MZ512714 |
| VSP1689 | B.1.1.7 | hCoV-19/USA/VSP1689/2021    | MZ512717 |
| VSP1691 | B.1.1.7 | hCoV-19/USA/VSP1691/2021    | MZ512719 |
| VSP1692 | B.1.1.7 | hCoV-19/USA/VSP1692/2021    | MZ512720 |
| VSP1695 | B.1.1.7 | hCoV-19/USA/VSP1695/2021    | MZ512722 |
| VSP1701 | B.1.1.7 | hCoV-19/USA/VSP1701/2021    | MZ512728 |
| VSP1702 | B.1.1.7 | hCoV-19/USA/VSP1702/2021    | MZ512729 |
| VSP1705 | B.1.1.7 | hCoV-19/USA/VSP1705/2021    | MZ512732 |
| VSP1706 | B.1.1.7 | hCoV-19/USA/VSP1706/2021    | MZ512733 |
| VSP1707 | B.1.1.7 | hCoV-19/USA/VSP1707/2021    | MZ512734 |
| VSP1721 | B.1.1.7 | hCoV-19/USA/PA-VSP1721/2021 | OK245941 |
| VSP1738 | B.1.1.7 | hCoV-19/USA/PA-VSP1738/2021 | OK245942 |
| VSP1739 | B.1.1.7 | hCoV-19/USA/PA-VSP1739/2021 | OK245943 |
| VSP1740 | B.1.1.7 | hCoV-19/USA/PA-VSP1740/2021 | OK245944 |
| VSP1741 | B.1.1.7 | hCoV-19/USA/PA-VSP1741/2021 | OK245945 |
| VSP1742 | B.1.1.7 | hCoV-19/USA/PA-VSP1742/2021 | MZ156658 |
| VSP1743 | B.1.1.7 | hCoV-19/USA/PA-VSP1743/2021 | MZ156659 |
| VSP1744 | B.1.1.7 | hCoV-19/USA/NJ-VSP1744/2021 | MZ156660 |
| VSP1746 | B.1.1.7 | hCoV-19/USA/NJ-VSP1746/2021 | MZ156661 |
| VSP1748 | B.1.1.7 | hCoV-19/USA/PA-VSP1748/2021 | MZ156662 |
| VSP1749 | B.1.1.7 | hCoV-19/USA/PA-VSP1749/2021 | MZ156663 |
| VSP1750 | B.1.1.7 | hCoV-19/USA/PA-VSP1750/2021 | MZ156664 |
| VSP1751 | B.1.1.7 | hCoV-19/USA/PA-VSP1751/2021 | MZ156665 |
| VSP1752 | B.1.1.7 | hCoV-19/USA/PA-VSP1752/2021 | MZ156666 |
| VSP1755 | B.1.1.7 | hCoV-19/USA/PA-VSP1755/2021 | MZ156667 |
| VSP1756 | B.1.1.7 | hCoV-19/USA/PA-VSP1756/2021 | MZ156668 |
| VSP1758 | B.1.1.7 | hCoV-19/USA/DE-VSP1758/2021 |          |
| VSP1760 | B.1.1.7 | hCoV-19/USA/PA-VSP1760/2021 | MZ156669 |
| VSP1761 | B.1.1.7 | hCoV-19/USA/PA-VSP1761/2021 | MZ156670 |
| VSP1762 | B.1.1.7 | hCoV-19/USA/PA-VSP1762/2021 | MZ156671 |
| VSP1764 | B.1.1.7 | hCoV-19/USA/PA-VSP1764/2021 | MZ156672 |
| VSP1765 | B.1.1.7 | hCoV-19/USA/PA-VSP1765/2021 | MZ156673 |
| VSP1766 | B.1.1.7 | hCoV-19/USA/PA-VSP1766/2021 | MZ156674 |

|         |         |                             |          |
|---------|---------|-----------------------------|----------|
| VSP1767 | B.1.1.7 | hCoV-19/USA/PA-VSP1767/2021 | MZ156675 |
| VSP1768 | B.1.1.7 | hCoV-19/USA/PA-VSP1768/2021 | MZ156676 |
| VSP1769 | B.1.1.7 | hCoV-19/USA/PA-VSP1769/2021 | MZ156677 |
| VSP1770 | B.1.1.7 | hCoV-19/USA/PA-VSP1770/2021 | MZ156678 |
| VSP1771 | B.1.1.7 | hCoV-19/USA/PA-VSP1771/2021 | MZ156679 |
| VSP1772 | B.1.1.7 | hCoV-19/USA/PA-VSP1772/2021 | MZ156680 |
| VSP1773 | B.1.1.7 | hCoV-19/USA/PA-VSP1773/2021 | MZ156681 |
| VSP1774 | B.1.1.7 | hCoV-19/USA/PA-VSP1774/2021 | MZ156682 |
| VSP1775 | B.1.1.7 | hCoV-19/USA/PA-VSP1775/2021 | MZ156683 |
| VSP1776 | B.1.1.7 | hCoV-19/USA/PA-VSP1776/2021 | MZ156684 |
| VSP1777 | B.1.1.7 | hCoV-19/USA/PA-VSP1777/2021 | MZ156685 |
| VSP1778 | B.1.1.7 | hCoV-19/USA/PA-VSP1778/2021 | MZ156686 |
| VSP1779 | B.1.1.7 | hCoV-19/USA/PA-VSP1779/2021 | MZ156687 |
| VSP1793 | B.1.1.7 | hCoV-19/USA/VSP1793/2021    | MZ512752 |
| VSP1801 | B.1.1.7 | hCoV-19/USA/VSP1801/2021    | MZ512758 |
| VSP1804 | B.1.1.7 | hCoV-19/USA/VSP1804/2021    | MZ512761 |
| VSP1805 | B.1.1.7 | hCoV-19/USA/VSP1805/2021    | MZ512762 |
| VSP1806 | B.1.1.7 | hCoV-19/USA/VSP1806/2021    | MZ512763 |
| VSP1808 | B.1.1.7 | hCoV-19/USA/VSP1808/2021    | MZ512765 |
| VSP1811 | B.1.1.7 | hCoV-19/USA/VSP1811/2021    | MZ512767 |
| VSP1813 | B.1.1.7 | hCoV-19/USA/VSP1813/2021    | MZ512769 |
| VSP1819 | B.1.1.7 | hCoV-19/USA/VSP1819/2021    | MZ512773 |
| VSP1820 | B.1.1.7 | hCoV-19/USA/VSP1820/2021    | MZ512774 |
| VSP1824 | B.1.1.7 | hCoV-19/USA/VSP1824/2021    | MZ512778 |
| VSP1825 | B.1.1.7 | hCoV-19/USA/VSP1825/2021    | MZ512779 |
| VSP1827 | B.1.1.7 | hCoV-19/USA/VSP1827/2021    | MZ512780 |
| VSP1830 | B.1.1.7 | hCoV-19/USA/VSP1830/2021    | MZ512782 |
| VSP1834 | B.1.1.7 | hCoV-19/USA/VSP1834/2021    | MZ512785 |
| VSP1836 | B.1.1.7 | hCoV-19/USA/VSP1836/2021    | MZ512787 |
| VSP1839 | B.1.1.7 | hCoV-19/USA/VSP1839/2021    | MZ512790 |
| VSP1841 | B.1.1.7 | hCoV-19/USA/PA-VSP1841/2021 | OK245947 |
| VSP1845 | B.1.1.7 | hCoV-19/USA/PA-VSP1845/2021 | OK245951 |
| VSP1846 | B.1.1.7 | hCoV-19/USA/PA-VSP1846/2021 | OK245952 |
| VSP1847 | B.1.1.7 | hCoV-19/USA/PA-VSP1847/2021 | OK245953 |
| VSP1848 | B.1.1.7 | hCoV-19/USA/PA-VSP1848/2021 | OK245954 |
| VSP1849 | B.1.1.7 | hCoV-19/USA/PA-VSP1849/2021 | OK245955 |
| VSP1850 | B.1.1.7 | hCoV-19/USA/PA-VSP1850/2021 | OK245956 |
| VSP1851 | B.1.1.7 | hCoV-19/USA/PA-VSP1851/2021 | OK245957 |
| VSP1852 | B.1.1.7 | hCoV-19/USA/PA-VSP1852/2021 | OK245958 |
| VSP1854 | B.1.1.7 | hCoV-19/USA/PA-VSP1854/2021 | OK245960 |
| VSP1857 | B.1.1.7 | hCoV-19/USA/PA-VSP1857/2021 | OK245963 |
| VSP1858 | B.1.1.7 | hCoV-19/USA/PA-VSP1858/2021 | OK245964 |
| VSP1860 | B.1.1.7 | hCoV-19/USA/PA-VSP1860/2021 | OK245966 |
| VSP1861 | B.1.1.7 | hCoV-19/USA/PA-VSP1861/2021 | OK245967 |
| VSP1862 | B.1.1.7 | hCoV-19/USA/PA-VSP1862/2021 | OK245968 |
| VSP1868 | B.1.1.7 | hCoV-19/USA/NJ-VSP1868/2021 | OK245974 |
| VSP1870 | B.1.1.7 | hCoV-19/USA/NJ-VSP1870/2021 | OK245976 |
| VSP1871 | B.1.1.7 | hCoV-19/USA/NJ-VSP1871/2021 | OK245977 |

|         |         |                             |          |
|---------|---------|-----------------------------|----------|
| VSP1873 | B.1.1.7 | hCoV-19/USA/NJ-VSP1873/2021 | OK245979 |
| VSP1875 | B.1.1.7 | hCoV-19/USA/NJ-VSP1875/2021 | OK245981 |
| VSP1878 | B.1.1.7 | hCoV-19/USA/PA-VSP1878/2021 | MZ156696 |
| VSP1881 | B.1.1.7 | hCoV-19/USA/PA-VSP1881/2021 | MZ156699 |
| VSP1884 | B.1.1.7 | hCoV-19/USA/PA-VSP1884/2021 | MZ156702 |
| VSP1889 | B.1.1.7 | hCoV-19/USA/PA-VSP1889/2021 | MZ156707 |
| VSP1890 | B.1.1.7 | hCoV-19/USA/NJ-VSP1890/2021 | MZ156708 |
| VSP1891 | B.1.1.7 | hCoV-19/USA/PA-VSP1891/2021 | MZ156709 |
| VSP1892 | B.1.1.7 | hCoV-19/USA/NY-VSP1892/2021 | MZ156710 |
| VSP1895 | B.1.1.7 | hCoV-19/USA/NJ-VSP1895/2021 | MZ156713 |
| VSP1897 | B.1.1.7 | hCoV-19/USA/PA-VSP1897/2021 | MZ156714 |
| VSP1898 | B.1.1.7 | hCoV-19/USA/PA-VSP1898/2021 | MZ156715 |
| VSP1899 | B.1.1.7 | hCoV-19/USA/PA-VSP1899/2021 | MZ156716 |
| VSP1900 | B.1.1.7 | hCoV-19/USA/PA-VSP1900/2021 | MZ156717 |
| VSP1902 | B.1.1.7 | hCoV-19/USA/PA-VSP1902/2021 | MZ156719 |
| VSP1903 | B.1.1.7 | hCoV-19/USA/PA-VSP1903/2021 | MZ156720 |
| VSP1911 | B.1.1.7 | hCoV-19/USA/PA-VSP1911/2021 | MZ156727 |
| VSP1914 | B.1.1.7 | hCoV-19/USA/PA-VSP1914/2021 | MZ156730 |
| VSP1916 | B.1.1.7 | hCoV-19/USA/PA-VSP1916/2021 | OK245983 |
| VSP1934 | B.1.1.7 | hCoV-19/USA/VA-VSP1934/2021 | MZ156737 |
| VSP1937 | B.1.1.7 | hCoV-19/USA/PA-VSP1937/2021 | MZ156740 |
| VSP1943 | B.1.1.7 | hCoV-19/USA/PA-VSP1943/2021 | MZ156741 |
| VSP1947 | B.1.1.7 | hCoV-19/USA/PA-VSP1947/2021 | MZ156744 |
| VSP1949 | B.1.1.7 | hCoV-19/USA/PA-VSP1949/2021 | MZ156746 |
| VSP1965 | B.1.1.7 | hCoV-19/USA/PA-VSP1965/2021 | MZ156754 |
| VSP1983 | B.1.1.7 | hCoV-19/USA/PA-VSP1983/2021 | OK245990 |
| VSP1989 | B.1.1.7 | hCoV-19/USA/PA-VSP1989/2021 | OK245991 |
| VSP1996 | B.1.1.7 | hCoV-19/USA/PA-VSP1996/2021 | OK245992 |
| VSP1999 | B.1.1.7 | hCoV-19/USA/PA-VSP1999/2021 | OK245993 |
| VSP2000 | B.1.1.7 | hCoV-19/USA/PA-VSP2000/2021 | OK245994 |
| VSP2006 | B.1.1.7 | hCoV-19/USA/PA-VSP2006/2021 | OK246000 |
| VSP2007 | B.1.1.7 | hCoV-19/USA/PA-VSP2007/2021 | OK246001 |
| VSP2008 | B.1.1.7 | hCoV-19/USA/PA-VSP2008/2021 | OK246002 |
| VSP2009 | B.1.1.7 | hCoV-19/USA/PA-VSP2009/2021 | OK246003 |
| VSP2010 | B.1.1.7 | hCoV-19/USA/PA-VSP2010/2021 | OK246004 |
| VSP2011 | B.1.1.7 | hCoV-19/USA/PA-VSP2011/2021 | OK246005 |
| VSP2014 | B.1.1.7 | hCoV-19/USA/PA-VSP2014/2021 | OK246008 |
| VSP2015 | B.1.1.7 | hCoV-19/USA/PA-VSP2015/2021 | OK246009 |
| VSP2016 | B.1.1.7 | hCoV-19/USA/PA-VSP2016/2021 | OK246010 |
| VSP2017 | B.1.1.7 | hCoV-19/USA/PA-VSP2017/2021 | OK246011 |
| VSP2021 | B.1.1.7 | hCoV-19/USA/PA-VSP2021/2021 | OK246014 |
| VSP2023 | B.1.1.7 | hCoV-19/USA/PA-VSP2023/2021 | OK246016 |
| VSP2025 | B.1.1.7 | hCoV-19/USA/PA-VSP2025/2021 | OK246017 |
| VSP2034 | B.1.1.7 | hCoV-19/USA/PA-VSP2034/2021 | OK246023 |
| VSP2035 | B.1.1.7 | hCoV-19/USA/PA-VSP2035/2021 | OK246024 |
| VSP2039 | B.1.1.7 | hCoV-19/USA/PA-VSP2039/2021 | OK246027 |
| VSP2044 | B.1.1.7 | hCoV-19/USA/PA-VSP2044/2021 | OK246030 |
| VSP2047 | B.1.1.7 | hCoV-19/USA/PA-VSP2047/2021 | OK246031 |

|         |         |                             |          |
|---------|---------|-----------------------------|----------|
| VSP2053 | B.1.1.7 | hCoV-19/USA/PA-VSP2053/2021 | OK246035 |
| VSP2055 | B.1.1.7 | hCoV-19/USA/PA-VSP2055/2021 | OK246037 |
| VSP2058 | B.1.1.7 | hCoV-19/USA/PA-VSP2058/2021 | OK246038 |
| VSP2061 | B.1.1.7 | hCoV-19/USA/PA-VSP2061/2021 | OK246041 |
| VSP2062 | B.1.1.7 | hCoV-19/USA/PA-VSP2062/2021 | OK246042 |
| VSP2063 | B.1.1.7 | hCoV-19/USA/PA-VSP2063/2021 | OK246043 |
| VSP2065 | B.1.1.7 | hCoV-19/USA/PA-VSP2065/2021 | OK246045 |
| VSP2066 | B.1.1.7 | hCoV-19/USA/PA-VSP2066/2021 | OK246046 |
| VSP2067 | B.1.1.7 | hCoV-19/USA/PA-VSP2067/2021 | OK246047 |
| VSP2068 | B.1.1.7 | hCoV-19/USA/PA-VSP2068/2021 | OK246048 |
| VSP2069 | B.1.1.7 | hCoV-19/USA/PA-VSP2069/2021 | OK246049 |
| VSP2070 | B.1.1.7 | hCoV-19/USA/PA-VSP2070/2021 | OK246050 |
| VSP2072 | B.1.1.7 | hCoV-19/USA/PA-VSP2072/2021 | OK246052 |
| VSP2073 | B.1.1.7 | hCoV-19/USA/PA-VSP2073/2021 | OK246053 |
| VSP2074 | B.1.1.7 | hCoV-19/USA/PA-VSP2074/2021 |          |
| VSP2075 | B.1.1.7 | hCoV-19/USA/PA-VSP2075/2021 | OK246054 |
| VSP2076 | B.1.1.7 | hCoV-19/USA/PA-VSP2076/2021 | OK246055 |
| VSP2078 | B.1.1.7 | hCoV-19/USA/PA-VSP2078/2021 | OK246057 |
| VSP2081 | B.1.1.7 | hCoV-19/USA/PA-VSP2081/2021 | OK246059 |
| VSP2083 | B.1.1.7 | hCoV-19/USA/PA-VSP2083/2021 | OK246061 |
| VSP2084 | B.1.1.7 | hCoV-19/USA/PA-VSP2084/2021 | OK246062 |
| VSP2085 | B.1.1.7 | hCoV-19/USA/PA-VSP2085/2021 |          |
| VSP2086 | B.1.1.7 | hCoV-19/USA/PA-VSP2086/2021 | OK246063 |
| VSP2088 | B.1.1.7 | hCoV-19/USA/PA-VSP2088/2021 | OK246065 |
| VSP2089 | B.1.1.7 | hCoV-19/USA/PA-VSP2089/2021 | OK246066 |
| VSP2090 | B.1.1.7 | hCoV-19/USA/PA-VSP2090/2021 | OK246067 |
| VSP2092 | B.1.1.7 | hCoV-19/USA/PA-VSP2092/2021 | OK246069 |
| VSP2093 | B.1.1.7 | hCoV-19/USA/PA-VSP2093/2021 | OK246070 |
| VSP2094 | B.1.1.7 | hCoV-19/USA/PA-VSP2094/2021 | OK246071 |
| VSP2096 | B.1.1.7 | hCoV-19/USA/PA-VSP2096/2021 | OK246072 |
| VSP2099 | B.1.1.7 | hCoV-19/USA/PA-VSP2099/2021 | OK246075 |
| VSP2100 | B.1.1.7 | hCoV-19/USA/PA-VSP2100/2021 | OK246076 |
| VSP2102 | B.1.1.7 | hCoV-19/USA/DE-VSP2102/2021 | OK246078 |
| VSP2103 | B.1.1.7 | hCoV-19/USA/PA-VSP2103/2021 | OK246079 |
| VSP2105 | B.1.1.7 | hCoV-19/USA/PA-VSP2105/2021 | OK246081 |
| VSP2106 | B.1.1.7 | hCoV-19/USA/PA-VSP2106/2021 | OK246082 |
| VSP2107 | B.1.1.7 | hCoV-19/USA/PA-VSP2107/2021 | OK246083 |
| VSP2108 | B.1.1.7 | hCoV-19/USA/PA-VSP2108/2021 | OK246084 |
| VSP2110 | B.1.1.7 | hCoV-19/USA/PA-VSP2110/2021 | OK246086 |
| VSP2111 | B.1.1.7 | hCoV-19/USA/PA-VSP2111/2021 | OK246087 |
| VSP2112 | B.1.1.7 | hCoV-19/USA/PA-VSP2112/2021 | OK246088 |
| VSP2113 | B.1.1.7 | hCoV-19/USA/PA-VSP2113/2021 | OK246089 |
| VSP2114 | B.1.1.7 | hCoV-19/USA/PA-VSP2114/2021 | OK246090 |
| VSP2115 | B.1.1.7 | hCoV-19/USA/PA-VSP2115/2021 | OK246091 |
| VSP2116 | B.1.1.7 | hCoV-19/USA/PA-VSP2116/2021 | OK246092 |
| VSP2117 | B.1.1.7 | hCoV-19/USA/NJ-VSP2117/2021 | OK246093 |
| VSP2118 | B.1.1.7 | hCoV-19/USA/PA-VSP2118/2021 | OK246094 |
| VSP2119 | B.1.1.7 | hCoV-19/USA/PA-VSP2119/2021 | OK246095 |

|         |         |                             |          |
|---------|---------|-----------------------------|----------|
| VSP2120 | B.1.1.7 | hCoV-19/USA/PA-VSP2120/2021 | OK246096 |
| VSP2121 | B.1.1.7 | hCoV-19/USA/PA-VSP2121/2021 | OK246097 |
| VSP2123 | B.1.1.7 | hCoV-19/USA/PA-VSP2123/2021 | OK246099 |
| VSP2124 | B.1.1.7 | hCoV-19/USA/PA-VSP2124/2021 | OK246100 |
| VSP2126 | B.1.1.7 | hCoV-19/USA/PA-VSP2126/2021 | OK246102 |
| VSP2128 | B.1.1.7 | hCoV-19/USA/PA-VSP2128/2021 | OK246104 |
| VSP2129 | B.1.1.7 | hCoV-19/USA/PA-VSP2129/2021 | OK246105 |
| VSP2130 | B.1.1.7 | hCoV-19/USA/PA-VSP2130/2021 | OK246106 |
| VSP2131 | B.1.1.7 | hCoV-19/USA/PA-VSP2131/2021 | OK246107 |
| VSP2132 | B.1.1.7 | hCoV-19/USA/PA-VSP2132/2021 | OK246108 |
| VSP2133 | B.1.1.7 | hCoV-19/USA/PA-VSP2133/2021 |          |
| VSP2134 | B.1.1.7 | hCoV-19/USA/PA-VSP2134/2021 | OK246109 |
| VSP2135 | B.1.1.7 | hCoV-19/USA/PA-VSP2135/2021 | OK246110 |
| VSP2136 | B.1.1.7 | hCoV-19/USA/PA-VSP2136/2021 | OK246111 |
| VSP2138 | B.1.1.7 | hCoV-19/USA/PA-VSP2138/2021 | OK246113 |
| VSP2139 | B.1.1.7 | hCoV-19/USA/PA-VSP2139/2021 | OK246114 |
| VSP2142 | B.1.1.7 | hCoV-19/USA/PA-VSP2142/2021 | OK246115 |
| VSP2143 | B.1.1.7 | hCoV-19/USA/PA-VSP2143/2021 | OK246116 |
| VSP2144 | B.1.1.7 | hCoV-19/USA/PA-VSP2144/2021 | OK246117 |
| VSP2145 | B.1.1.7 | hCoV-19/USA/PA-VSP2145/2021 | OK246118 |
| VSP2146 | B.1.1.7 | hCoV-19/USA/PA-VSP2146/2021 | OK246119 |
| VSP2147 | B.1.1.7 | hCoV-19/USA/PA-VSP2147/2021 | OK246120 |
| VSP2148 | B.1.1.7 | hCoV-19/USA/PA-VSP2148/2021 | OK246121 |
| VSP2151 | B.1.1.7 | hCoV-19/USA/PA-VSP2151/2021 | OK246123 |
| VSP2152 | B.1.1.7 | hCoV-19/USA/NJ-VSP2152/2021 | OK246124 |
| VSP2153 | B.1.1.7 | hCoV-19/USA/PA-VSP2153/2021 | OK246125 |
| VSP2155 | B.1.1.7 | hCoV-19/USA/NJ-VSP2155/2021 | OK246126 |
| VSP2156 | B.1.1.7 | hCoV-19/USA/PA-VSP2156/2021 | OK246127 |
| VSP2157 | B.1.1.7 | hCoV-19/USA/PA-VSP2157/2021 | OK246128 |
| VSP2158 | B.1.1.7 | hCoV-19/USA/PA-VSP2158/2021 | OK246129 |
| VSP2159 | B.1.1.7 | hCoV-19/USA/NJ-VSP2159/2021 | OK246130 |
| VSP2160 | B.1.1.7 | hCoV-19/USA/PA-VSP2160/2021 | OK246131 |
| VSP2171 | B.1.1.7 | hCoV-19/USA/PA-VSP2171/2021 | OK246137 |
| VSP2172 | B.1.1.7 | hCoV-19/USA/PA-VSP2172/2021 | OK246138 |
| VSP2174 | B.1.1.7 | hCoV-19/USA/PA-VSP2174/2021 | OK246139 |
| VSP2175 | B.1.1.7 | hCoV-19/USA/PA-VSP2175/2021 | OK246140 |
| VSP2176 | B.1.1.7 | hCoV-19/USA/PA-VSP2176/2021 | OK246141 |
| VSP2177 | B.1.1.7 | hCoV-19/USA/PA-VSP2177/2021 | OK246142 |
| VSP2178 | B.1.1.7 | hCoV-19/USA/PA-VSP2178/2021 | OK246143 |
| VSP2179 | B.1.1.7 | hCoV-19/USA/PA-VSP2179/2021 | OK246144 |
| VSP2180 | B.1.1.7 | hCoV-19/USA/NJ-VSP2180/2021 | OK246145 |
| VSP2181 | B.1.1.7 | hCoV-19/USA/NJ-VSP2181/2021 | OK246146 |
| VSP2183 | B.1.1.7 | hCoV-19/USA/NJ-VSP2183/2021 | OK246147 |
| VSP2185 | B.1.1.7 | hCoV-19/USA/NJ-VSP2185/2021 | OK246149 |
| VSP2189 | B.1.1.7 | hCoV-19/USA/PA-VSP2189/2021 | OK246152 |
| VSP2190 | B.1.1.7 | hCoV-19/USA/PA-VSP2190/2021 | OK246153 |
| VSP2191 | B.1.1.7 | hCoV-19/USA/PA-VSP2191/2021 | OK246154 |
| VSP2192 | B.1.1.7 | hCoV-19/USA/PA-VSP2192/2021 | OK246155 |

|         |         |                             |          |
|---------|---------|-----------------------------|----------|
| VSP2194 | B.1.1.7 | hCoV-19/USA/PA-VSP2194/2021 | OK246157 |
| VSP2197 | B.1.1.7 | hCoV-19/USA/PA-VSP2197/2021 | OK246158 |
| VSP2198 | B.1.1.7 | hCoV-19/USA/PA-VSP2198/2021 | OK246159 |
| VSP2199 | B.1.1.7 | hCoV-19/USA/PA-VSP2199/2021 | OK246160 |
| VSP2200 | B.1.1.7 | hCoV-19/USA/PA-VSP2200/2021 | OK246161 |
| VSP2201 | B.1.1.7 | hCoV-19/USA/PA-VSP2201/2021 | OK246162 |
| VSP2202 | B.1.1.7 | hCoV-19/USA/PA-VSP2202/2021 | OK246163 |
| VSP2207 | B.1.1.7 | hCoV-19/USA/VSP2207/2021    | MZ512792 |
| VSP2209 | B.1.1.7 | hCoV-19/USA/VSP2209/2021    | MZ512794 |
| VSP2210 | B.1.1.7 | hCoV-19/USA/VSP2210/2021    | MZ512795 |
| VSP2211 | B.1.1.7 | hCoV-19/USA/VSP2211/2021    | MZ512796 |
| VSP2212 | B.1.1.7 | hCoV-19/USA/VSP2212/2021    | MZ512797 |
| VSP2214 | B.1.1.7 | hCoV-19/USA/VSP2214/2021    | MZ512799 |
| VSP2215 | B.1.1.7 | hCoV-19/USA/VSP2215/2021    | MZ512800 |
| VSP2216 | B.1.1.7 | hCoV-19/USA/VSP2216/2021    | MZ512801 |
| VSP2218 | B.1.1.7 | hCoV-19/USA/VSP2218/2021    | MZ512802 |
| VSP2219 | B.1.1.7 | hCoV-19/USA/VSP2219/2021    | MZ512803 |
| VSP2221 | B.1.1.7 | hCoV-19/USA/VSP2221/2021    | MZ512805 |
| VSP2222 | B.1.1.7 | hCoV-19/USA/VSP2222/2021    | MZ512806 |
| VSP2225 | B.1.1.7 | hCoV-19/USA/VSP2225/2021    | MZ512808 |
| VSP2226 | B.1.1.7 | hCoV-19/USA/VSP2226/2021    | MZ512809 |
| VSP2227 | B.1.1.7 | hCoV-19/USA/VSP2227/2021    |          |
| VSP2230 | B.1.1.7 | hCoV-19/USA/VSP2230/2021    | MZ512812 |
| VSP2232 | B.1.1.7 | hCoV-19/USA/VSP2232/2021    | MZ512814 |
| VSP2233 | B.1.1.7 | hCoV-19/USA/VSP2233/2021    | MZ512815 |
| VSP2235 | B.1.1.7 | hCoV-19/USA/VSP2235/2021    | MZ512817 |
| VSP2236 | B.1.1.7 | hCoV-19/USA/VSP2236/2021    | MZ512818 |
| VSP2237 | B.1.1.7 | hCoV-19/USA/VSP2237/2021    | MZ512819 |
| VSP2238 | B.1.1.7 | hCoV-19/USA/VSP2238/2021    | MZ512820 |
| VSP2239 | B.1.1.7 | hCoV-19/USA/VSP2239/2021    | MZ512821 |
| VSP2240 | B.1.1.7 | hCoV-19/USA/VSP2240/2021    | MZ512822 |
| VSP2241 | B.1.1.7 | hCoV-19/USA/VSP2241/2021    | MZ512823 |
| VSP2242 | B.1.1.7 | hCoV-19/USA/VSP2242/2021    | MZ512824 |
| VSP2243 | B.1.1.7 | hCoV-19/USA/VSP2243/2021    | MZ512825 |
| VSP2244 | B.1.1.7 | hCoV-19/USA/VSP2244/2021    | MZ512826 |
| VSP2245 | B.1.1.7 | hCoV-19/USA/VSP2245/2021    | MZ512827 |
| VSP2247 | B.1.1.7 | hCoV-19/USA/VSP2247/2021    | MZ512829 |
| VSP2248 | B.1.1.7 | hCoV-19/USA/VSP2248/2021    | MZ512830 |
| VSP2249 | B.1.1.7 | hCoV-19/USA/VSP2249/2021    | MZ512831 |
| VSP2250 | B.1.1.7 | hCoV-19/USA/VSP2250/2021    | MZ512832 |
| VSP2251 | B.1.1.7 | hCoV-19/USA/VSP2251/2021    | MZ512833 |
| VSP2252 | B.1.1.7 | hCoV-19/USA/VSP2252/2021    | MZ512834 |
| VSP2254 | B.1.1.7 | hCoV-19/USA/VSP2254/2021    | MZ512836 |
| VSP2256 | B.1.1.7 | hCoV-19/USA/VSP2256/2021    | MZ512838 |
| VSP2258 | B.1.1.7 | hCoV-19/USA/VSP2258/2021    | MZ512839 |
| VSP2259 | B.1.1.7 | hCoV-19/USA/VSP2259/2021    | MZ512840 |
| VSP2260 | B.1.1.7 | hCoV-19/USA/VSP2260/2021    | MZ512841 |
| VSP2261 | B.1.1.7 | hCoV-19/USA/VSP2261/2021    | MZ512842 |

|         |         |                             |          |
|---------|---------|-----------------------------|----------|
| VSP2262 | B.1.1.7 | hCoV-19/USA/VSP2262/2021    | MZ512843 |
| VSP2263 | B.1.1.7 | hCoV-19/USA/VSP2263/2021    | MZ512844 |
| VSP2264 | B.1.1.7 | hCoV-19/USA/VSP2264/2021    | MZ512845 |
| VSP2266 | B.1.1.7 | hCoV-19/USA/VSP2266/2021    | MZ512847 |
| VSP2267 | B.1.1.7 | hCoV-19/USA/VSP2267/2021    | MZ512848 |
| VSP2268 | B.1.1.7 | hCoV-19/USA/VSP2268/2021    | MZ512849 |
| VSP2269 | B.1.1.7 | hCoV-19/USA/VSP2269/2021    | MZ512850 |
| VSP2272 | B.1.1.7 | hCoV-19/USA/VSP2272/2021    | MZ512852 |
| VSP2276 | B.1.1.7 | hCoV-19/USA/VSP2276/2021    | MZ512856 |
| VSP2277 | B.1.1.7 | hCoV-19/USA/VSP2277/2021    | MZ512857 |
| VSP2278 | B.1.1.7 | hCoV-19/USA/VSP2278/2021    | MZ512858 |
| VSP2280 | B.1.1.7 | hCoV-19/USA/VSP2280/2021    | MZ512860 |
| VSP2282 | B.1.1.7 | hCoV-19/USA/VSP2282/2021    | MZ512862 |
| VSP2283 | B.1.1.7 | hCoV-19/USA/VSP2283/2021    | MZ512863 |
| VSP2285 | B.1.1.7 | hCoV-19/USA/VSP2285/2021    | MZ512865 |
| VSP2286 | B.1.1.7 | hCoV-19/USA/VSP2286/2021    | MZ512866 |
| VSP2288 | B.1.1.7 | hCoV-19/USA/VSP2288/2021    | MZ512868 |
| VSP2289 | B.1.1.7 | hCoV-19/USA/VSP2289/2021    | MZ512869 |
| VSP2290 | B.1.1.7 | hCoV-19/USA/VSP2290/2021    | MZ512870 |
| VSP2291 | B.1.1.7 | hCoV-19/USA/VSP2291/2021    | MZ512871 |
| VSP2292 | B.1.1.7 | hCoV-19/USA/VSP2292/2021    | MZ512872 |
| VSP2294 | B.1.1.7 | hCoV-19/USA/VSP2294/2021    | MZ512874 |
| VSP2295 | B.1.1.7 | hCoV-19/USA/VSP2295/2021    | MZ512875 |
| VSP2296 | B.1.1.7 | hCoV-19/USA/PA-VSP2296/2021 | OK246166 |
| VSP2298 | B.1.1.7 | hCoV-19/USA/PA-VSP2298/2021 | OK246168 |
| VSP2300 | B.1.1.7 | hCoV-19/USA/PA-VSP2300/2021 | OK246170 |
| VSP2302 | B.1.1.7 | hCoV-19/USA/PA-VSP2302/2021 | OK246171 |
| VSP2304 | B.1.1.7 | hCoV-19/USA/PA-VSP2304/2021 | OK246173 |
| VSP2310 | B.1.1.7 | hCoV-19/USA/PA-VSP2310/2021 | OK246178 |
| VSP2317 | B.1.1.7 | hCoV-19/USA/PA-VSP2317/2021 | OK246185 |
| VSP2318 | B.1.1.7 | hCoV-19/USA/PA-VSP2318/2021 | OK246186 |
| VSP2319 | B.1.1.7 | hCoV-19/USA/PA-VSP2319/2021 | OK246187 |
| VSP2323 | B.1.1.7 | hCoV-19/USA/PA-VSP2323/2021 | OK246190 |
| VSP2329 | B.1.1.7 | hCoV-19/USA/PA-VSP2329/2021 | OK246196 |
| VSP2330 | B.1.1.7 | hCoV-19/USA/PA-VSP2330/2021 | OK246197 |
| VSP2331 | B.1.1.7 | hCoV-19/USA/PA-VSP2331/2021 | OK246198 |
| VSP2332 | B.1.1.7 | hCoV-19/USA/PA-VSP2332/2021 | OK246199 |
| VSP2335 | B.1.1.7 | hCoV-19/USA/PA-VSP2335/2021 | OK246202 |
| VSP2338 | B.1.1.7 | hCoV-19/USA/PA-VSP2338/2021 | OK246204 |
| VSP2340 | B.1.1.7 | hCoV-19/USA/PA-VSP2340/2021 | OK246206 |
| VSP2343 | B.1.1.7 | hCoV-19/USA/PA-VSP2343/2021 | OK246209 |
| VSP2345 | B.1.1.7 | hCoV-19/USA/PA-VSP2345/2021 | OK246211 |
| VSP2346 | B.1.1.7 | hCoV-19/USA/PA-VSP2346/2021 | OK246212 |
| VSP2347 | B.1.1.7 | hCoV-19/USA/PA-VSP2347/2021 | OK246213 |
| VSP2348 | B.1.1.7 | hCoV-19/USA/PA-VSP2348/2021 | OK246214 |
| VSP2349 | B.1.1.7 | hCoV-19/USA/PA-VSP2349/2021 | OK246215 |
| VSP2350 | B.1.1.7 | hCoV-19/USA/PA-VSP2350/2021 | OK246216 |
| VSP2351 | B.1.1.7 | hCoV-19/USA/PA-VSP2351/2021 | OK246217 |

|         |         |                             |          |
|---------|---------|-----------------------------|----------|
| VSP2352 | B.1.1.7 | hCoV-19/USA/PA-VSP2352/2021 | OK246218 |
| VSP2353 | B.1.1.7 | hCoV-19/USA/PA-VSP2353/2021 | OK246219 |
| VSP2354 | B.1.1.7 | hCoV-19/USA/NJ-VSP2354/2021 | OK246220 |
| VSP2356 | B.1.1.7 | hCoV-19/USA/PA-VSP2356/2021 | OK246222 |
| VSP2357 | B.1.1.7 | hCoV-19/USA/NJ-VSP2357/2021 | OK246223 |
| VSP2358 | B.1.1.7 | hCoV-19/USA/NJ-VSP2358/2021 | OK246224 |
| VSP2359 | B.1.1.7 | hCoV-19/USA/NJ-VSP2359/2021 | OK246225 |
| VSP2361 | B.1.1.7 | hCoV-19/USA/NJ-VSP2361/2021 | OK246227 |
| VSP2365 | B.1.1.7 | hCoV-19/USA/VSP2365/2021    | MZ512876 |
| VSP2369 | B.1.1.7 | hCoV-19/USA/PA-VSP2369/2021 | OK246228 |
| VSP2403 | B.1.1.7 | hCoV-19/USA/PA-VSP2403/2021 | OK246229 |
| VSP2407 | B.1.1.7 | hCoV-19/USA/PA-VSP2407/2021 | OK246233 |
| VSP2408 | B.1.1.7 | hCoV-19/USA/NJ-VSP2408/2021 | OK246234 |
| VSP2409 | B.1.1.7 | hCoV-19/USA/PA-VSP2409/2021 | OK246235 |
| VSP2410 | B.1.1.7 | hCoV-19/USA/PA-VSP2410/2021 | OK246236 |
| VSP2411 | B.1.1.7 | hCoV-19/USA/PA-VSP2411/2021 | OK246237 |
| VSP2412 | B.1.1.7 | hCoV-19/USA/PA-VSP2412/2021 | OK246238 |
| VSP2413 | B.1.1.7 | hCoV-19/USA/PA-VSP2413/2021 | OK246239 |
| VSP2415 | B.1.1.7 | hCoV-19/USA/DE-VSP2415/2021 | OK246241 |
| VSP2416 | B.1.1.7 | hCoV-19/USA/PA-VSP2416/2021 | OK246242 |
| VSP2420 | B.1.1.7 | hCoV-19/USA/PA-VSP2420/2021 | OK246246 |
| VSP2423 | B.1.1.7 | hCoV-19/USA/PA-VSP2423/2021 | OK246248 |
| VSP2424 | B.1.1.7 | hCoV-19/USA/PA-VSP2424/2021 | OK246249 |
| VSP2425 | B.1.1.7 | hCoV-19/USA/PA-VSP2425/2021 | OK246250 |
| VSP2426 | B.1.1.7 | hCoV-19/USA/PA-VSP2426/2021 | OK246251 |
| VSP2427 | B.1.1.7 | hCoV-19/USA/PA-VSP2427/2021 | OK246252 |
| VSP2428 | B.1.1.7 | hCoV-19/USA/PA-VSP2428/2021 | OK246253 |
| VSP2431 | B.1.1.7 | hCoV-19/USA/PA-VSP2431/2021 | OK246256 |
| VSP2432 | B.1.1.7 | hCoV-19/USA/PA-VSP2432/2021 | OK246257 |
| VSP2437 | B.1.1.7 | hCoV-19/USA/PA-VSP2437/2021 | OK246261 |
| VSP2438 | B.1.1.7 | hCoV-19/USA/PA-VSP2438/2021 | OK246262 |
| VSP2439 | B.1.1.7 | hCoV-19/USA/NJ-VSP2439/2021 | OK246263 |
| VSP2440 | B.1.1.7 | hCoV-19/USA/PA-VSP2440/2021 | OK246264 |
| VSP2441 | B.1.1.7 | hCoV-19/USA/PA-VSP2441/2021 | OK246265 |
| VSP2442 | B.1.1.7 | hCoV-19/USA/PA-VSP2442/2021 | OK246266 |
| VSP2445 | B.1.1.7 | hCoV-19/USA/PA-VSP2445/2021 | OK246269 |
| VSP2447 | B.1.1.7 | hCoV-19/USA/PA-VSP2447/2021 | OK246271 |
| VSP2448 | B.1.1.7 | hCoV-19/USA/PA-VSP2448/2021 | OK246272 |
| VSP2449 | B.1.1.7 | hCoV-19/USA/PA-VSP2449/2021 | OK246273 |
| VSP2450 | B.1.1.7 | hCoV-19/USA/PA-VSP2450/2021 | OK246274 |
| VSP2451 | B.1.1.7 | hCoV-19/USA/PA-VSP2451/2021 | OK246275 |
| VSP2452 | B.1.1.7 | hCoV-19/USA/PA-VSP2452/2021 | OK246276 |
| VSP2455 | B.1.1.7 | hCoV-19/USA/PA-VSP2455/2021 | OK246279 |
| VSP2456 | B.1.1.7 | hCoV-19/USA/PA-VSP2456/2021 | OK246280 |
| VSP2457 | B.1.1.7 | hCoV-19/USA/PA-VSP2457/2021 |          |
| VSP2458 | B.1.1.7 | hCoV-19/USA/PA-VSP2458/2021 | OK246281 |
| VSP2461 | B.1.1.7 | hCoV-19/USA/PA-VSP2461/2021 | OK246283 |
| VSP2462 | B.1.1.7 | hCoV-19/USA/PA-VSP2462/2021 | OK246284 |

|         |         |                             |          |
|---------|---------|-----------------------------|----------|
| VSP2463 | B.1.1.7 | hCoV-19/USA/PA-VSP2463/2021 | OK246285 |
| VSP2464 | B.1.1.7 | hCoV-19/USA/PA-VSP2464/2021 | OK246286 |
| VSP2466 | B.1.1.7 | hCoV-19/USA/PA-VSP2466/2021 | OK246288 |
| VSP2468 | B.1.1.7 | hCoV-19/USA/PA-VSP2468/2021 | OK246290 |
| VSP2475 | B.1.1.7 | hCoV-19/USA/PA-VSP2475/2021 | OK246295 |
| VSP2477 | B.1.1.7 | hCoV-19/USA/PA-VSP2477/2021 | OK246297 |
| VSP2478 | B.1.1.7 | hCoV-19/USA/PA-VSP2478/2021 | OK246298 |
| VSP2480 | B.1.1.7 | hCoV-19/USA/PA-VSP2480/2021 | OK246300 |
| VSP2482 | B.1.1.7 | hCoV-19/USA/PA-VSP2482/2021 | OK246302 |
| VSP2483 | B.1.1.7 | hCoV-19/USA/PA-VSP2483/2021 | OK246303 |
| VSP2488 | B.1.1.7 | hCoV-19/USA/PA-VSP2488/2021 | OK246307 |
| VSP2491 | B.1.1.7 | hCoV-19/USA/PA-VSP2491/2021 | OK246310 |
| VSP2492 | B.1.1.7 | hCoV-19/USA/AL-VSP2492/2021 | OK246311 |
| VSP2493 | B.1.1.7 | hCoV-19/USA/PA-VSP2493/2021 | OK246312 |
| VSP2494 | B.1.1.7 | hCoV-19/USA/PA-VSP2494/2021 | OK246313 |
| VSP2495 | B.1.1.7 | hCoV-19/USA/PA-VSP2495/2021 | OK246314 |
| VSP2498 | B.1.1.7 | hCoV-19/USA/PA-VSP2498/2021 | OK246317 |
| VSP2500 | B.1.1.7 | hCoV-19/USA/PA-VSP2500/2021 | OK246319 |
| VSP2501 | B.1.1.7 | hCoV-19/USA/PA-VSP2501/2021 | OK246320 |
| VSP2503 | B.1.1.7 | hCoV-19/USA/PA-VSP2503/2021 | OK246322 |
| VSP2506 | B.1.1.7 | hCoV-19/USA/PA-VSP2506/2021 | OK246324 |
| VSP2508 | B.1.1.7 | hCoV-19/USA/PA-VSP2508/2021 | OK246326 |
| VSP2512 | B.1.1.7 | hCoV-19/USA/PA-VSP2512/2021 | OK246330 |
| VSP2514 | B.1.1.7 | hCoV-19/USA/PA-VSP2514/2021 | OK246332 |
| VSP2515 | B.1.1.7 | hCoV-19/USA/PA-VSP2515/2021 | OK246333 |
| VSP2519 | B.1.1.7 | hCoV-19/USA/PA-VSP2519/2021 | OK246337 |
| VSP2521 | B.1.1.7 | hCoV-19/USA/LA-VSP2521/2021 | OK246339 |
| VSP2522 | B.1.1.7 | hCoV-19/USA/PA-VSP2522/2021 | OK246340 |
| VSP2524 | B.1.1.7 | hCoV-19/USA/NJ-VSP2524/2021 | OK246342 |
| VSP2525 | B.1.1.7 | hCoV-19/USA/PA-VSP2525/2021 | OK246343 |
| VSP2526 | B.1.1.7 | hCoV-19/USA/PA-VSP2526/2021 | OK246344 |
| VSP2528 | B.1.1.7 | hCoV-19/USA/PA-VSP2528/2021 | OK246345 |
| VSP2529 | B.1.1.7 | hCoV-19/USA/PA-VSP2529/2021 | OK246346 |
| VSP2530 | B.1.1.7 | hCoV-19/USA/PA-VSP2530/2021 | OK246347 |
| VSP2534 | B.1.1.7 | hCoV-19/USA/PA-VSP2534/2021 | OK246348 |
| VSP2535 | B.1.1.7 | hCoV-19/USA/PA-VSP2535/2021 | OK246349 |
| VSP2536 | B.1.1.7 | hCoV-19/USA/PA-VSP2536/2021 | OK246350 |
| VSP2537 | B.1.1.7 | hCoV-19/USA/PA-VSP2537/2021 | OK246351 |
| VSP2541 | B.1.1.7 | hCoV-19/USA/PA-VSP2541/2021 | OK246355 |
| VSP2542 | B.1.1.7 | hCoV-19/USA/PA-VSP2542/2021 | OK246356 |
| VSP2545 | B.1.1.7 | hCoV-19/USA/NJ-VSP2545/2021 | OK246358 |
| VSP2547 | B.1.1.7 | hCoV-19/USA/NJ-VSP2547/2021 | OK246360 |
| VSP2552 | B.1.1.7 | hCoV-19/USA/NJ-VSP2552/2021 | OK246363 |
| VSP2553 | B.1.1.7 | hCoV-19/USA/PA-VSP2553/2021 | OK246364 |
| VSP2555 | B.1.1.7 | hCoV-19/USA/PA-VSP2555/2021 | OK246366 |
| VSP2557 | B.1.1.7 | hCoV-19/USA/PA-VSP2557/2021 | OK246368 |
| VSP2558 | B.1.1.7 | hCoV-19/USA/PA-VSP2558/2021 | OK246369 |
| VSP2559 | B.1.1.7 | hCoV-19/USA/PA-VSP2559/2021 | OK246370 |

|         |         |                             |          |
|---------|---------|-----------------------------|----------|
| VSP2560 | B.1.1.7 | hCoV-19/USA/PA-VSP2560/2021 | OK246371 |
| VSP2562 | B.1.1.7 | hCoV-19/USA/PA-VSP2562/2021 | OK246373 |
| VSP2568 | B.1.1.7 | hCoV-19/USA/NJ-VSP2568/2021 | OK246378 |
| VSP2570 | B.1.1.7 | hCoV-19/USA/NJ-VSP2570/2021 | OK246379 |
| VSP2572 | B.1.1.7 | hCoV-19/USA/PA-VSP2572/2021 | OK246381 |
| VSP2575 | B.1.1.7 | hCoV-19/USA/PA-VSP2575/2021 | OK246384 |
| VSP2577 | B.1.1.7 | hCoV-19/USA/PA-VSP2577/2021 | OK246386 |
| VSP2579 | B.1.1.7 | hCoV-19/USA/PA-VSP2579/2021 | OK246388 |
| VSP2581 | B.1.1.7 | hCoV-19/USA/PA-VSP2581/2021 | OK246390 |
| VSP2582 | B.1.1.7 | hCoV-19/USA/PA-VSP2582/2021 | OK246391 |
| VSP2585 | B.1.1.7 | hCoV-19/USA/PA-VSP2585/2021 | OK246394 |
| VSP2586 | B.1.1.7 | hCoV-19/USA/PA-VSP2586/2021 | OK246395 |
| VSP2587 | B.1.1.7 | hCoV-19/USA/PA-VSP2587/2021 | OK246396 |
| VSP2588 | B.1.1.7 | hCoV-19/USA/PA-VSP2588/2021 | OK246397 |
| VSP2589 | B.1.1.7 | hCoV-19/USA/PA-VSP2589/2021 | OK246398 |
| VSP2590 | B.1.1.7 | hCoV-19/USA/PA-VSP2590/2021 | OK246399 |
| VSP2591 | B.1.1.7 | hCoV-19/USA/NJ-VSP2591/2021 | OK246400 |
| VSP2593 | B.1.1.7 | hCoV-19/USA/PA-VSP2593/2021 | OK246402 |
| VSP2595 | B.1.1.7 | hCoV-19/USA/PA-VSP2595/2021 | OK246404 |
| VSP2596 | B.1.1.7 | hCoV-19/USA/PA-VSP2596/2021 | OK246405 |
| VSP2597 | B.1.1.7 | hCoV-19/USA/PA-VSP2597/2021 | OK246406 |
| VSP2599 | B.1.1.7 | hCoV-19/USA/PA-VSP2599/2021 | OK246407 |
| VSP2600 | B.1.1.7 | hCoV-19/USA/PA-VSP2600/2021 | OK246408 |
| VSP2601 | B.1.1.7 | hCoV-19/USA/PA-VSP2601/2021 | OK246409 |
| VSP2604 | B.1.1.7 | hCoV-19/USA/PA-VSP2604/2021 | OK246412 |
| VSP2606 | B.1.1.7 | hCoV-19/USA/PA-VSP2606/2021 | OK246414 |
| VSP2607 | B.1.1.7 | hCoV-19/USA/PA-VSP2607/2021 | OK246415 |
| VSP2611 | B.1.1.7 | hCoV-19/USA/PA-VSP2611/2021 | OK246419 |
| VSP2613 | B.1.1.7 | hCoV-19/USA/PA-VSP2613/2021 | OK246421 |
| VSP2615 | B.1.1.7 | hCoV-19/USA/PA-VSP2615/2021 | OK246423 |
| VSP2616 | B.1.1.7 | hCoV-19/USA/PA-VSP2616/2021 | OK246424 |
| VSP2617 | B.1.1.7 | hCoV-19/USA/PA-VSP2617/2021 | OK246425 |
| VSP2618 | B.1.1.7 | hCoV-19/USA/PA-VSP2618/2021 | OK246426 |
| VSP2620 | B.1.1.7 | hCoV-19/USA/PA-VSP2620/2021 | OK246428 |
| VSP2622 | B.1.1.7 | hCoV-19/USA/PA-VSP2622/2021 | OK246430 |
| VSP2624 | B.1.1.7 | hCoV-19/USA/PA-VSP2624/2021 | OK246432 |
| VSP2626 | B.1.1.7 | hCoV-19/USA/PA-VSP2626/2021 | OK246434 |
| VSP2627 | B.1.1.7 | hCoV-19/USA/PA-VSP2627/2021 | OK246435 |
| VSP2628 | B.1.1.7 | hCoV-19/USA/PA-VSP2628/2021 | OK246436 |
| VSP2629 | B.1.1.7 | hCoV-19/USA/PA-VSP2629/2021 | OK246437 |
| VSP2630 | B.1.1.7 | hCoV-19/USA/PA-VSP2630/2021 | OK246438 |
| VSP2632 | B.1.1.7 | hCoV-19/USA/PA-VSP2632/2021 | OK246440 |
| VSP2636 | B.1.1.7 | hCoV-19/USA/VSP2636/2021    | MZ512880 |
| VSP2638 | B.1.1.7 | hCoV-19/USA/VSP2638/2021    | MZ512881 |
| VSP2640 | B.1.1.7 | hCoV-19/USA/VSP2640/2021    | MZ512883 |
| VSP2641 | B.1.1.7 | hCoV-19/USA/VSP2641/2021    | MZ512884 |
| VSP2648 | B.1.1.7 | hCoV-19/USA/VSP2648/2021    | MZ512888 |
| VSP2657 | B.1.1.7 | hCoV-19/USA/VSP2657/2021    | MZ512894 |

|         |         |                             |          |
|---------|---------|-----------------------------|----------|
| VSP2658 | B.1.1.7 | hCoV-19/USA/VSP2658/2021    | MZ512895 |
| VSP2659 | B.1.1.7 | hCoV-19/USA/VSP2659/2021    | MZ512896 |
| VSP2661 | B.1.1.7 | hCoV-19/USA/VSP2661/2021    | MZ512897 |
| VSP2663 | B.1.1.7 | hCoV-19/USA/VSP2663/2021    | MZ512899 |
| VSP2665 | B.1.1.7 | hCoV-19/USA/VSP2665/2021    | MZ512901 |
| VSP2666 | B.1.1.7 | hCoV-19/USA/VSP2666/2021    | MZ512902 |
| VSP2667 | B.1.1.7 | hCoV-19/USA/VSP2667/2021    | MZ512903 |
| VSP2668 | B.1.1.7 | hCoV-19/USA/VSP2668/2021    | MZ512904 |
| VSP2669 | B.1.1.7 | hCoV-19/USA/VSP2669/2021    | MZ512905 |
| VSP2671 | B.1.1.7 | hCoV-19/USA/VSP2671/2021    | MZ512907 |
| VSP2672 | B.1.1.7 | hCoV-19/USA/VSP2672/2021    | MZ512908 |
| VSP2673 | B.1.1.7 | hCoV-19/USA/VSP2673/2021    | MZ512909 |
| VSP2674 | B.1.1.7 | hCoV-19/USA/VSP2674/2021    | MZ512910 |
| VSP2675 | B.1.1.7 | hCoV-19/USA/VSP2675/2021    | MZ512911 |
| VSP2676 | B.1.1.7 | hCoV-19/USA/VSP2676/2021    | MZ512912 |
| VSP2679 | B.1.1.7 | hCoV-19/USA/VSP2679/2021    | MZ512913 |
| VSP2680 | B.1.1.7 | hCoV-19/USA/VSP2680/2021    | MZ512914 |
| VSP2681 | B.1.1.7 | hCoV-19/USA/VSP2681/2021    | MZ512915 |
| VSP2683 | B.1.1.7 | hCoV-19/USA/VSP2683/2021    | MZ512917 |
| VSP2712 | B.1.1.7 | hCoV-19/USA/PA-VSP2712/2021 | OK246441 |
| VSP2714 | B.1.1.7 | hCoV-19/USA/PA-VSP2714/2021 | OK246442 |
| VSP2716 | B.1.1.7 | hCoV-19/USA/PA-VSP2716/2021 | OK246444 |
| VSP2717 | B.1.1.7 | hCoV-19/USA/PA-VSP2717/2021 | OK246445 |
| VSP2721 | B.1.1.7 | hCoV-19/USA/PA-VSP2721/2021 | OK246449 |
| VSP2722 | B.1.1.7 | hCoV-19/USA/PA-VSP2722/2021 | OK246450 |
| VSP2723 | B.1.1.7 | hCoV-19/USA/PA-VSP2723/2021 | OK246451 |
| VSP2724 | B.1.1.7 | hCoV-19/USA/PA-VSP2724/2021 | OK246452 |
| VSP2725 | B.1.1.7 | hCoV-19/USA/PA-VSP2725/2021 | OK246453 |
| VSP2726 | B.1.1.7 | hCoV-19/USA/PA-VSP2726/2021 | OK246454 |
| VSP2728 | B.1.1.7 | hCoV-19/USA/PA-VSP2728/2021 | OK246456 |
| VSP2729 | B.1.1.7 | hCoV-19/USA/PA-VSP2729/2021 | OK246457 |
| VSP2730 | B.1.1.7 | hCoV-19/USA/PA-VSP2730/2021 | OK246458 |
| VSP2731 | B.1.1.7 | hCoV-19/USA/PA-VSP2731/2021 | OK246459 |
| VSP2733 | B.1.1.7 | hCoV-19/USA/PA-VSP2733/2021 | OK246461 |
| VSP2738 | B.1.1.7 | hCoV-19/USA/NJ-VSP2738/2021 | OK246463 |
| VSP2740 | B.1.1.7 | hCoV-19/USA/NJ-VSP2740/2021 | OK246465 |
| VSP2743 | B.1.1.7 | hCoV-19/USA/NJ-VSP2743/2021 | OK246468 |
| VSP2744 | B.1.1.7 | hCoV-19/USA/PA-VSP2744/2021 | OK246469 |
| VSP2745 | B.1.1.7 | hCoV-19/USA/PA-VSP2745/2021 | OK246470 |
| VSP2746 | B.1.1.7 | hCoV-19/USA/PA-VSP2746/2021 | OK246471 |
| VSP2748 | B.1.1.7 | hCoV-19/USA/PA-VSP2748/2021 | OK246473 |
| VSP2749 | B.1.1.7 | hCoV-19/USA/NJ-VSP2749/2021 | OK246474 |
| VSP2750 | B.1.1.7 | hCoV-19/USA/PA-VSP2750/2021 | OK246475 |
| VSP2751 | B.1.1.7 | hCoV-19/USA/PA-VSP2751/2021 | OK246476 |
| VSP2752 | B.1.1.7 | hCoV-19/USA/NJ-VSP2752/2021 | OK246477 |
| VSP2753 | B.1.1.7 | hCoV-19/USA/PA-VSP2753/2021 | OK246478 |
| VSP2756 | B.1.1.7 | hCoV-19/USA/PA-VSP2756/2021 | OK246480 |
| VSP2757 | B.1.1.7 | hCoV-19/USA/NJ-VSP2757/2021 | OK246481 |

|         |         |                             |          |
|---------|---------|-----------------------------|----------|
| VSP2759 | B.1.1.7 | hCoV-19/USA/PA-VSP2759/2021 | OK246482 |
| VSP2760 | B.1.1.7 | hCoV-19/USA/PA-VSP2760/2021 | OK246483 |
| VSP2763 | B.1.1.7 | hCoV-19/USA/PA-VSP2763/2021 | OK246486 |
| VSP2769 | B.1.1.7 | hCoV-19/USA/PA-VSP2769/2021 | OK246489 |
| VSP2770 | B.1.1.7 | hCoV-19/USA/PA-VSP2770/2021 | OK246490 |
| VSP2772 | B.1.1.7 | hCoV-19/USA/PA-VSP2772/2021 | OK246492 |
| VSP2773 | B.1.1.7 | hCoV-19/USA/PA-VSP2773/2021 | OK246493 |
| VSP2776 | B.1.1.7 | hCoV-19/USA/PA-VSP2776/2021 | OK246495 |
| VSP2777 | B.1.1.7 | hCoV-19/USA/PA-VSP2777/2021 | OK246496 |
| VSP2778 | B.1.1.7 | hCoV-19/USA/PA-VSP2778/2021 | OK246497 |
| VSP2785 | B.1.1.7 | hCoV-19/USA/PA-VSP2785/2021 | OK246502 |
| VSP2786 | B.1.1.7 | hCoV-19/USA/PA-VSP2786/2021 | OK246503 |
| VSP2787 | B.1.1.7 | hCoV-19/USA/PA-VSP2787/2021 |          |
| VSP2788 | B.1.1.7 | hCoV-19/USA/PA-VSP2788/2021 | OK246504 |
| VSP2789 | B.1.1.7 | hCoV-19/USA/PA-VSP2789/2021 | OK246505 |
| VSP2790 | B.1.1.7 | hCoV-19/USA/DE-VSP2790/2021 | OK246506 |
| VSP2792 | B.1.1.7 | hCoV-19/USA/PA-VSP2792/2021 | OK246508 |
| VSP2793 | B.1.1.7 | hCoV-19/USA/PA-VSP2793/2021 | OK246509 |
| VSP2797 | B.1.1.7 | hCoV-19/USA/PA-VSP2797/2021 | OK246513 |
| VSP2798 | B.1.1.7 | hCoV-19/USA/PA-VSP2798/2021 | OK246514 |
| VSP2799 | B.1.1.7 | hCoV-19/USA/PA-VSP2799/2021 | OK246515 |
| VSP2803 | B.1.1.7 | hCoV-19/USA/PA-VSP2803/2021 | OK246516 |
| VSP2804 | B.1.1.7 | hCoV-19/USA/PA-VSP2804/2021 | OK246517 |
| VSP2805 | B.1.1.7 | hCoV-19/USA/PA-VSP2805/2021 | OK246518 |
| VSP2806 | B.1.1.7 | hCoV-19/USA/DE-VSP2806/2021 | OK246519 |
| VSP2807 | B.1.1.7 | hCoV-19/USA/PA-VSP2807/2021 | OK246520 |
| VSP2808 | B.1.1.7 | hCoV-19/USA/PA-VSP2808/2021 | OK246521 |
| VSP2811 | B.1.1.7 | hCoV-19/USA/PA-VSP2811/2021 | OK246523 |
| VSP2813 | B.1.1.7 | hCoV-19/USA/PA-VSP2813/2021 | OK246525 |
| VSP2815 | B.1.1.7 | hCoV-19/USA/PA-VSP2815/2021 | OK246526 |
| VSP2816 | B.1.1.7 | hCoV-19/USA/PA-VSP2816/2021 | OK246527 |
| VSP2817 | B.1.1.7 | hCoV-19/USA/PA-VSP2817/2021 | OK246528 |
| VSP2818 | B.1.1.7 | hCoV-19/USA/PA-VSP2818/2021 | OK246529 |
| VSP2820 | B.1.1.7 | hCoV-19/USA/PA-VSP2820/2021 | OK246531 |
| VSP2822 | B.1.1.7 | hCoV-19/USA/PA-VSP2822/2021 | OK246532 |
| VSP2827 | B.1.1.7 | hCoV-19/USA/PA-VSP2827/2021 | OK246537 |
| VSP2829 | B.1.1.7 | hCoV-19/USA/PA-VSP2829/2021 | OK246539 |
| VSP2831 | B.1.1.7 | hCoV-19/USA/PA-VSP2831/2021 | OK246541 |
| VSP2832 | B.1.1.7 | hCoV-19/USA/PA-VSP2832/2021 | OK246542 |
| VSP2834 | B.1.1.7 | hCoV-19/USA/PA-VSP2834/2021 | OK246544 |
| VSP2838 | B.1.1.7 | hCoV-19/USA/PA-VSP2838/2021 | OK246547 |
| VSP2839 | B.1.1.7 | hCoV-19/USA/PA-VSP2839/2021 | OK246548 |
| VSP2845 | B.1.1.7 | hCoV-19/USA/PA-VSP2845/2021 | OK246552 |
| VSP2848 | B.1.1.7 | hCoV-19/USA/PA-VSP2848/2021 | OK246554 |
| VSP2849 | B.1.1.7 | hCoV-19/USA/PA-VSP2849/2021 | OK246555 |
| VSP2854 | B.1.1.7 | hCoV-19/USA/PA-VSP2854/2021 | OK246558 |
| VSP2857 | B.1.1.7 | hCoV-19/USA/PA-VSP2857/2021 | OK246559 |
| VSP2859 | B.1.1.7 | hCoV-19/USA/PA-VSP2859/2021 | OK246561 |

|         |         |                             |          |
|---------|---------|-----------------------------|----------|
| VSP2863 | B.1.1.7 | hCoV-19/USA/PA-VSP2863/2021 | OK246564 |
| VSP2864 | B.1.1.7 | hCoV-19/USA/PA-VSP2864/2021 | OK246565 |
| VSP2868 | B.1.1.7 | hCoV-19/USA/PA-VSP2868/2021 | OK246569 |
| VSP2869 | B.1.1.7 | hCoV-19/USA/PA-VSP2869/2021 | OK246570 |
| VSP2870 | B.1.1.7 | hCoV-19/USA/PA-VSP2870/2021 | OK246571 |
| VSP2871 | B.1.1.7 | hCoV-19/USA/PA-VSP2871/2021 | OK246572 |
| VSP2873 | B.1.1.7 | hCoV-19/USA/PA-VSP2873/2021 | OK246574 |
| VSP2874 | B.1.1.7 | hCoV-19/USA/PA-VSP2874/2021 | OK246575 |
| VSP2875 | B.1.1.7 | hCoV-19/USA/PA-VSP2875/2021 | OK246576 |
| VSP2876 | B.1.1.7 | hCoV-19/USA/PA-VSP2876/2021 | OK246577 |
| VSP2877 | B.1.1.7 | hCoV-19/USA/PA-VSP2877/2021 | OK246578 |
| VSP2878 | B.1.1.7 | hCoV-19/USA/PA-VSP2878/2021 | OK246579 |
| VSP2879 | B.1.1.7 | hCoV-19/USA/PA-VSP2879/2021 | OK246580 |
| VSP2880 | B.1.1.7 | hCoV-19/USA/PA-VSP2880/2021 | OK246581 |
| VSP2885 | B.1.1.7 | hCoV-19/USA/VSP2885/2021    | MZ512918 |
| VSP2886 | B.1.1.7 | hCoV-19/USA/VSP2886/2021    | MZ512919 |
| VSP2888 | B.1.1.7 | hCoV-19/USA/VSP2888/2021    | MZ512921 |
| VSP2890 | B.1.1.7 | hCoV-19/USA/VSP2890/2021    | MZ512923 |
| VSP2891 | B.1.1.7 | hCoV-19/USA/VSP2891/2021    | MZ512924 |
| VSP2892 | B.1.1.7 | hCoV-19/USA/VSP2892/2021    | MZ512925 |
| VSP2893 | B.1.1.7 | hCoV-19/USA/VSP2893/2021    | MZ512926 |
| VSP2894 | B.1.1.7 | hCoV-19/USA/VSP2894/2021    | MZ512927 |
| VSP2895 | B.1.1.7 | hCoV-19/USA/VSP2895/2021    | MZ512928 |
| VSP2896 | B.1.1.7 | hCoV-19/USA/VSP2896/2021    | MZ512929 |
| VSP2897 | B.1.1.7 | hCoV-19/USA/VSP2897/2021    | MZ512930 |
| VSP2898 | B.1.1.7 | hCoV-19/USA/VSP2898/2021    | MZ512931 |
| VSP2901 | B.1.1.7 | hCoV-19/USA/VSP2901/2021    | MZ512934 |
| VSP2902 | B.1.1.7 | hCoV-19/USA/VSP2902/2021    | MZ512935 |
| VSP2904 | B.1.1.7 | hCoV-19/USA/VSP2904/2021    | MZ512937 |
| VSP2906 | B.1.1.7 | hCoV-19/USA/VSP2906/2021    | MZ512938 |
| VSP2907 | B.1.1.7 | hCoV-19/USA/VSP2907/2021    | MZ512939 |
| VSP2909 | B.1.1.7 | hCoV-19/USA/VSP2909/2021    | MZ512941 |
| VSP2911 | B.1.1.7 | hCoV-19/USA/VSP2911/2021    | MZ512943 |
| VSP2916 | B.1.1.7 | hCoV-19/USA/VSP2916/2021    | MZ512947 |
| VSP2921 | B.1.1.7 | hCoV-19/USA/VSP2921/2021    | MZ512950 |
| VSP2923 | B.1.1.7 | hCoV-19/USA/VSP2923/2021    | MZ512952 |
| VSP2924 | B.1.1.7 | hCoV-19/USA/VSP2924/2021    | MZ512953 |
| VSP2926 | B.1.1.7 | hCoV-19/USA/VSP2926/2021    | MZ512955 |
| VSP2929 | B.1.1.7 | hCoV-19/USA/VSP2929/2021    | MZ512956 |
| VSP2931 | B.1.1.7 | hCoV-19/USA/VSP2931/2021    | MZ512958 |
| VSP2932 | B.1.1.7 | hCoV-19/USA/VSP2932/2021    | MZ512959 |
| VSP2937 | B.1.1.7 | hCoV-19/USA/VSP2937/2021    | MZ512964 |
| VSP2939 | B.1.1.7 | hCoV-19/USA/VSP2939/2021    | MZ512966 |
| VSP2942 | B.1.1.7 | hCoV-19/USA/VSP2942/2021    | MZ512968 |
| VSP2943 | B.1.1.7 | hCoV-19/USA/VSP2943/2021    | MZ512969 |
| VSP2944 | B.1.1.7 | hCoV-19/USA/VSP2944/2021    | MZ512970 |
| VSP2946 | B.1.1.7 | hCoV-19/USA/VSP2946/2021    | MZ512972 |
| VSP2949 | B.1.1.7 | hCoV-19/USA/VSP2949/2021    | MZ512975 |

|         |         |                             |          |
|---------|---------|-----------------------------|----------|
| VSP2951 | B.1.1.7 | hCoV-19/USA/VSP2951/2021    | MZ512977 |
| VSP2954 | B.1.1.7 | hCoV-19/USA/VSP2954/2021    | MZ512978 |
| VSP2956 | B.1.1.7 | hCoV-19/USA/VSP2956/2021    | MZ512980 |
| VSP2957 | B.1.1.7 | hCoV-19/USA/VSP2957/2021    | MZ512981 |
| VSP2958 | B.1.1.7 | hCoV-19/USA/VSP2958/2021    | MZ512982 |
| VSP2960 | B.1.1.7 | hCoV-19/USA/VSP2960/2021    | MZ512984 |
| VSP2962 | B.1.1.7 | hCoV-19/USA/VSP2962/2021    | MZ512985 |
| VSP2963 | B.1.1.7 | hCoV-19/USA/VSP2963/2021    | MZ512986 |
| VSP2965 | B.1.1.7 | hCoV-19/USA/VSP2965/2021    | MZ512987 |
| VSP3019 | B.1.1.7 | hCoV-19/USA/PA-VSP3019/2021 | OK246597 |
| VSP3037 | B.1.1.7 | hCoV-19/USA/PA-VSP3037/2021 | OK246613 |
| VSP3038 | B.1.1.7 | hCoV-19/USA/PA-VSP3038/2021 | OK246614 |
| VSP3040 | B.1.1.7 | hCoV-19/USA/PA-VSP3040/2021 | OK246616 |
| VSP3043 | B.1.1.7 | hCoV-19/USA/PA-VSP3043/2021 | OK246618 |
| VSP3047 | B.1.1.7 | hCoV-19/USA/PA-VSP3047/2021 | OK246622 |
| VSP3048 | B.1.1.7 | hCoV-19/USA/PA-VSP3048/2021 | OK246623 |
| VSP3049 | B.1.1.7 | hCoV-19/USA/PA-VSP3049/2021 | OK246624 |
| VSP3051 | B.1.1.7 | hCoV-19/USA/PA-VSP3051/2021 | OK246626 |
| VSP3052 | B.1.1.7 | hCoV-19/USA/PA-VSP3052/2021 | OK246627 |
| VSP3057 | B.1.1.7 | hCoV-19/USA/PA-VSP3057/2021 | OK246632 |
| VSP3058 | B.1.1.7 | hCoV-19/USA/PA-VSP3058/2021 | OK246633 |
| VSP3059 | B.1.1.7 | hCoV-19/USA/PA-VSP3059/2021 | OK246634 |
| VSP3063 | B.1.1.7 | hCoV-19/USA/PA-VSP3063/2021 | OK246638 |
| VSP3065 | B.1.1.7 | hCoV-19/USA/PA-VSP3065/2021 | OK246640 |
| VSP3066 | B.1.1.7 | hCoV-19/USA/PA-VSP3066/2021 | OK246641 |
| VSP3068 | B.1.1.7 | hCoV-19/USA/PA-VSP3068/2021 | OK246643 |
| VSP3069 | B.1.1.7 | hCoV-19/USA/PA-VSP3069/2021 | OK246644 |
| VSP3070 | B.1.1.7 | hCoV-19/USA/PA-VSP3070/2021 | OK246645 |
| VSP3073 | B.1.1.7 | hCoV-19/USA/PA-VSP3073/2021 | OK246648 |
| VSP3074 | B.1.1.7 | hCoV-19/USA/PA-VSP3074/2021 | OK246649 |
| VSP3076 | B.1.1.7 | hCoV-19/USA/PA-VSP3076/2021 | OK246650 |
| VSP3078 | B.1.1.7 | hCoV-19/USA/PA-VSP3078/2021 | OK246652 |
| VSP3079 | B.1.1.7 | hCoV-19/USA/PA-VSP3079/2021 | OK246653 |
| VSP3080 | B.1.1.7 | hCoV-19/USA/PA-VSP3080/2021 | OK246654 |
| VSP3082 | B.1.1.7 | hCoV-19/USA/PA-VSP3082/2021 | OK246655 |
| VSP3083 | B.1.1.7 | hCoV-19/USA/PA-VSP3083/2021 | OK246656 |
| VSP3085 | B.1.1.7 | hCoV-19/USA/PA-VSP3085/2021 | OK246658 |
| VSP3086 | B.1.1.7 | hCoV-19/USA/PA-VSP3086/2021 | OK246659 |
| VSP3089 | B.1.1.7 | hCoV-19/USA/PA-VSP3089/2021 | OK246661 |
| VSP3091 | B.1.1.7 | hCoV-19/USA/PA-VSP3091/2021 | OK246663 |
| VSP3092 | B.1.1.7 | hCoV-19/USA/PA-VSP3092/2021 | OK246664 |
| VSP3093 | B.1.1.7 | hCoV-19/USA/PA-VSP3093/2021 | OK246665 |
| VSP3094 | B.1.1.7 | hCoV-19/USA/PA-VSP3094/2021 | OK246666 |
| VSP3095 | B.1.1.7 | hCoV-19/USA/PA-VSP3095/2021 | OK246667 |
| VSP3097 | B.1.1.7 | hCoV-19/USA/PA-VSP3097/2021 | OK246669 |
| VSP3100 | B.1.1.7 | hCoV-19/USA/PA-VSP3100/2021 | OK246672 |
| VSP3101 | B.1.1.7 | hCoV-19/USA/PA-VSP3101/2021 | OK246673 |
| VSP3102 | B.1.1.7 | hCoV-19/USA/PA-VSP3102/2021 | OK246674 |

|         |         |                             |          |
|---------|---------|-----------------------------|----------|
| VSP3103 | B.1.1.7 | hCoV-19/USA/PA-VSP3103/2021 | OK246675 |
| VSP3106 | B.1.1.7 | hCoV-19/USA/PA-VSP3106/2021 | OK246678 |
| VSP3170 | B.1.1.7 | hCoV-19/USA/PA-VSP3170/2021 | OK246722 |
| VSP3171 | B.1.1.7 | hCoV-19/USA/PA-VSP3171/2021 | OK246723 |
| VSP3172 | B.1.1.7 | hCoV-19/USA/PA-VSP3172/2021 | OK246724 |
| VSP3173 | B.1.1.7 | hCoV-19/USA/PA-VSP3173/2021 | OK246725 |
| VSP3174 | B.1.1.7 | hCoV-19/USA/PA-VSP3174/2021 | OK246726 |
| VSP3175 | B.1.1.7 | hCoV-19/USA/PA-VSP3175/2021 | OK246727 |
| VSP3177 | B.1.1.7 | hCoV-19/USA/PA-VSP3177/2021 | OK246728 |
| VSP3178 | B.1.1.7 | hCoV-19/USA/PA-VSP3178/2021 | OK246729 |
| VSP3179 | B.1.1.7 | hCoV-19/USA/PA-VSP3179/2021 | OK246730 |
| VSP3180 | B.1.1.7 | hCoV-19/USA/PA-VSP3180/2021 | OK246731 |
| VSP3181 | B.1.1.7 | hCoV-19/USA/PA-VSP3181/2021 | OK246732 |
| VSP3184 | B.1.1.7 | hCoV-19/USA/PA-VSP3184/2021 | OK246735 |
| VSP3187 | B.1.1.7 | hCoV-19/USA/PA-VSP3187/2021 | OK246736 |
| VSP3188 | B.1.1.7 | hCoV-19/USA/PA-VSP3188/2021 | OK246737 |
| VSP3189 | B.1.1.7 | hCoV-19/USA/PA-VSP3189/2021 | OK246738 |
| VSP3190 | B.1.1.7 | hCoV-19/USA/PA-VSP3190/2021 | OK246739 |
| VSP3193 | B.1.1.7 | hCoV-19/USA/PA-VSP3193/2021 | OK246741 |
| VSP3194 | B.1.1.7 | hCoV-19/USA/PA-VSP3194/2021 | OK246742 |
| VSP3195 | B.1.1.7 | hCoV-19/USA/PA-VSP3195/2021 | OK246743 |
| VSP3196 | B.1.1.7 | hCoV-19/USA/PA-VSP3196/2021 | OK246744 |
| VSP3199 | B.1.1.7 | hCoV-19/USA/PA-VSP3199/2021 | OK246747 |
| VSP3200 | B.1.1.7 | hCoV-19/USA/PA-VSP3200/2021 | OK246748 |
| VSP3201 | B.1.1.7 | hCoV-19/USA/PA-VSP3201/2021 | OK246749 |
| VSP3202 | B.1.1.7 | hCoV-19/USA/PA-VSP3202/2021 | OK246750 |
| VSP3203 | B.1.1.7 | hCoV-19/USA/PA-VSP3203/2021 | OK246751 |
| VSP3204 | B.1.1.7 | hCoV-19/USA/PA-VSP3204/2021 | OK246752 |
| VSP3205 | B.1.1.7 | hCoV-19/USA/PA-VSP3205/2021 | OK246753 |
| VSP3206 | B.1.1.7 | hCoV-19/USA/PA-VSP3206/2021 | OK246754 |
| VSP3207 | B.1.1.7 | hCoV-19/USA/PA-VSP3207/2021 | OK246755 |
| VSP3209 | B.1.1.7 | hCoV-19/USA/PA-VSP3209/2021 | OK246757 |
| VSP3210 | B.1.1.7 | hCoV-19/USA/PA-VSP3210/2021 | OK246758 |
| VSP3212 | B.1.1.7 | hCoV-19/USA/PA-VSP3212/2021 | OK246760 |
| VSP3214 | B.1.1.7 | hCoV-19/USA/PA-VSP3214/2021 | OK246761 |
| VSP3215 | B.1.1.7 | hCoV-19/USA/PA-VSP3215/2021 | OK246762 |
| VSP3216 | B.1.1.7 | hCoV-19/USA/PA-VSP3216/2021 | OK246763 |
| VSP3218 | B.1.1.7 | hCoV-19/USA/PA-VSP3218/2021 | OK246765 |
| VSP3219 | B.1.1.7 | hCoV-19/USA/PA-VSP3219/2021 |          |
| VSP3220 | B.1.1.7 | hCoV-19/USA/PA-VSP3220/2021 | OK246766 |
| VSP3327 | B.1.1.7 | hCoV-19/USA/PA-VSP3327/2021 | OK246773 |
| VSP3329 | B.1.1.7 | hCoV-19/USA/PA-VSP3329/2021 | OK246775 |
| VSP3330 | B.1.1.7 | hCoV-19/USA/PA-VSP3330/2021 | OK246776 |
| VSP3339 | B.1.1.7 | hCoV-19/USA/PA-VSP3339/2021 | OK246782 |
| VSP3340 | B.1.1.7 | hCoV-19/USA/PA-VSP3340/2021 | OK246783 |
| VSP3342 | B.1.1.7 | hCoV-19/USA/PA-VSP3342/2021 | OK246785 |
| VSP3344 | B.1.1.7 | hCoV-19/USA/PA-VSP3344/2021 | OK246787 |
| VSP3345 | B.1.1.7 | hCoV-19/USA/PA-VSP3345/2021 | OK246788 |

|         |         |                             |          |
|---------|---------|-----------------------------|----------|
| VSP3346 | B.1.1.7 | hCoV-19/USA/PA-VSP3346/2021 | OK246789 |
| VSP3347 | B.1.1.7 | hCoV-19/USA/PA-VSP3347/2021 | OK246790 |
| VSP3351 | B.1.1.7 | hCoV-19/USA/PA-VSP3351/2021 | OK246791 |
| VSP3369 | B.1.1.7 | hCoV-19/USA/PA-VSP3369/2021 | OK246799 |
| VSP3370 | B.1.1.7 | hCoV-19/USA/PA-VSP3370/2021 | OK246800 |
| VSP3371 | B.1.1.7 | hCoV-19/USA/PA-VSP3371/2021 | OK246801 |
| VSP3374 | B.1.1.7 | hCoV-19/USA/PA-VSP3374/2021 | OK246804 |
| VSP3378 | B.1.1.7 | hCoV-19/USA/PA-VSP3378/2021 | OK246806 |
| VSP3380 | B.1.1.7 | hCoV-19/USA/PA-VSP3380/2021 | OK246807 |
| VSP3382 | B.1.1.7 | hCoV-19/USA/PA-VSP3382/2021 | OK246809 |
| VSP3387 | B.1.1.7 | hCoV-19/USA/PA-VSP3387/2021 | OK246813 |
| VSP3388 | B.1.1.7 | hCoV-19/USA/PA-VSP3388/2021 | OK246814 |
| VSP3395 | B.1.1.7 | hCoV-19/USA/PA-VSP3395/2021 | OK246818 |
| VSP3396 | B.1.1.7 | hCoV-19/USA/PA-VSP3396/2021 |          |
| VSP3397 | B.1.1.7 | hCoV-19/USA/PA-VSP3397/2021 | OK246819 |
| VSP3398 | B.1.1.7 | hCoV-19/USA/PA-VSP3398/2021 | OK246820 |
| VSP3400 | B.1.1.7 | hCoV-19/USA/PA-VSP3400/2021 | OK246822 |
| VSP3402 | B.1.1.7 | hCoV-19/USA/PA-VSP3402/2021 | OK246823 |
| VSP3403 | B.1.1.7 | hCoV-19/USA/PA-VSP3403/2021 | OK246824 |
| VSP3404 | B.1.1.7 | hCoV-19/USA/PA-VSP3404/2021 | OK246825 |
| VSP3409 | B.1.1.7 | hCoV-19/USA/PA-VSP3409/2021 | OK246829 |
| VSP3411 | B.1.1.7 | hCoV-19/USA/PA-VSP3411/2021 | OK246831 |
| VSP3412 | B.1.1.7 | hCoV-19/USA/PA-VSP3412/2021 | OK246832 |
| VSP3413 | B.1.1.7 | hCoV-19/USA/PA-VSP3413/2021 | OK246833 |
| VSP3414 | B.1.1.7 | hCoV-19/USA/PA-VSP3414/2021 | OK246834 |
| VSP3415 | B.1.1.7 | hCoV-19/USA/PA-VSP3415/2021 | OK246835 |
| VSP3416 | B.1.1.7 | hCoV-19/USA/PA-VSP3416/2021 | OK246836 |
| VSP3420 | B.1.1.7 | hCoV-19/USA/PA-VSP3420/2021 | OK246837 |
| VSP3423 | B.1.1.7 | hCoV-19/USA/PA-VSP3423/2021 | OK246839 |
| VSP3425 | B.1.1.7 | hCoV-19/USA/PA-VSP3425/2021 | OK246841 |
| VSP3426 | B.1.1.7 | hCoV-19/USA/PA-VSP3426/2021 | OK246842 |
| VSP3427 | B.1.1.7 | hCoV-19/USA/PA-VSP3427/2021 | OK246843 |
| VSP3428 | B.1.1.7 | hCoV-19/USA/PA-VSP3428/2021 | OK246844 |
| VSP3429 | B.1.1.7 | hCoV-19/USA/PA-VSP3429/2021 | OK246845 |
| VSP5001 | B.1.1.7 | hCoV-19/USA/PA-VSP5001/2021 | OK246847 |
| VSP5003 | B.1.1.7 | hCoV-19/USA/PA-VSP5003/2021 | OK246849 |
| VSP5006 | B.1.1.7 | hCoV-19/USA/PA-VSP5006/2021 | OK246851 |
| VSP5008 | B.1.1.7 | hCoV-19/USA/PA-VSP5008/2021 | OK246853 |
| VSP5012 | B.1.1.7 | hCoV-19/USA/NJ-VSP5012/2021 | OK246856 |
| VSP5014 | B.1.1.7 | hCoV-19/USA/PA-VSP5014/2021 | OK246858 |
| VSP5016 | B.1.1.7 | hCoV-19/USA/PA-VSP5016/2021 | OK246860 |
| VSP5020 | B.1.1.7 | hCoV-19/USA/PA-VSP5020/2021 | OK246863 |
| VSP5021 | B.1.1.7 | hCoV-19/USA/PA-VSP5021/2021 | OK246864 |
| VSP5022 | B.1.1.7 | hCoV-19/USA/PA-VSP5022/2021 | OK246865 |
| VSP5023 | B.1.1.7 | hCoV-19/USA/PA-VSP5023/2021 | OK246866 |
| VSP5024 | B.1.1.7 | hCoV-19/USA/PA-VSP5024/2021 | OK246867 |
| VSP5028 | B.1.1.7 | hCoV-19/USA/PA-VSP5028/2021 | OK246869 |
| VSP5030 | B.1.1.7 | hCoV-19/USA/PA-VSP5030/2021 | OK246871 |

|         |         |                             |          |
|---------|---------|-----------------------------|----------|
| VSP5032 | B.1.1.7 | hCoV-19/USA/PA-VSP5032/2021 | OK246872 |
| VSP5033 | B.1.1.7 | hCoV-19/USA/PA-VSP5033/2021 | OK246873 |
| VSP5034 | B.1.1.7 | hCoV-19/USA/PA-VSP5034/2021 | OK246874 |
| VSP5035 | B.1.1.7 | hCoV-19/USA/PA-VSP5035/2021 | OK246875 |
| VSP5037 | B.1.1.7 | hCoV-19/USA/PA-VSP5037/2021 | OK246877 |
| VSP5038 | B.1.1.7 | hCoV-19/USA/PA-VSP5038/2021 | OK246878 |
| VSP5040 | B.1.1.7 | hCoV-19/USA/PA-VSP5040/2021 | OK246880 |
| VSP5042 | B.1.1.7 | hCoV-19/USA/PA-VSP5042/2021 | OK246882 |
| VSP5043 | B.1.1.7 | hCoV-19/USA/PA-VSP5043/2021 | OK246883 |
| VSP5044 | B.1.1.7 | hCoV-19/USA/PA-VSP5044/2021 |          |
| VSP5046 | B.1.1.7 | hCoV-19/USA/PA-VSP5046/2021 | OK246885 |
| VSP5047 | B.1.1.7 | hCoV-19/USA/PA-VSP5047/2021 | OK246886 |
| VSP5049 | B.1.1.7 | hCoV-19/USA/PA-VSP5049/2021 | OK246888 |
| VSP5050 | B.1.1.7 | hCoV-19/USA/PA-VSP5050/2021 | OK246889 |
| VSP5051 | B.1.1.7 | hCoV-19/USA/PA-VSP5051/2021 | OK246890 |
| VSP5054 | B.1.1.7 | hCoV-19/USA/PA-VSP5054/2021 | OK246893 |
| VSP5055 | B.1.1.7 | hCoV-19/USA/PA-VSP5055/2021 | OK246894 |
| VSP5056 | B.1.1.7 | hCoV-19/USA/PA-VSP5056/2021 | OK246895 |
| VSP5059 | B.1.1.7 | hCoV-19/USA/PA-VSP5059/2021 | OK246896 |
| VSP5060 | B.1.1.7 | hCoV-19/USA/PA-VSP5060/2021 | OK246897 |
| VSP5061 | B.1.1.7 | hCoV-19/USA/PA-VSP5061/2021 | OK246898 |
| VSP5063 | B.1.1.7 | hCoV-19/USA/PA-VSP5063/2021 | OK246900 |
| VSP5068 | B.1.1.7 | hCoV-19/USA/PA-VSP5068/2021 | OK246904 |
| VSP5070 | B.1.1.7 | hCoV-19/USA/PA-VSP5070/2021 | OK246906 |
| VSP5073 | B.1.1.7 | hCoV-19/USA/PA-VSP5073/2021 | OK246908 |
| VSP5079 | B.1.1.7 | hCoV-19/USA/PA-VSP5079/2021 | OK246909 |
| VSP5082 | B.1.1.7 | hCoV-19/USA/PA-VSP5082/2021 | OK246912 |
| VSP5088 | B.1.1.7 | hCoV-19/USA/NJ-VSP5088/2021 | OK246917 |
| VSP5089 | B.1.1.7 | hCoV-19/USA/NJ-VSP5089/2021 | OK246918 |
| VSP5090 | B.1.1.7 | hCoV-19/USA/PA-VSP5090/2021 | OK246919 |
| VSP5092 | B.1.1.7 | hCoV-19/USA/PA-VSP5092/2021 | OK246921 |
| VSP5093 | B.1.1.7 | hCoV-19/USA/PA-VSP5093/2021 | OK246922 |
| VSP5094 | B.1.1.7 | hCoV-19/USA/PA-VSP5094/2021 | OK246923 |
| VSP5095 | B.1.1.7 | hCoV-19/USA/PA-VSP5095/2021 | OK246924 |
| VSP5096 | B.1.1.7 | hCoV-19/USA/PA-VSP5096/2021 | OK246925 |
| VSP5097 | B.1.1.7 | hCoV-19/USA/PA-VSP5097/2021 | OK246926 |
| VSP5101 | B.1.1.7 | hCoV-19/USA/PA-VSP5101/2021 | OK246930 |
| VSP5102 | B.1.1.7 | hCoV-19/USA/PA-VSP5102/2021 | OK246931 |
| VSP5103 | B.1.1.7 | hCoV-19/USA/PA-VSP5103/2021 | OK246932 |
| VSP5104 | B.1.1.7 | hCoV-19/USA/PA-VSP5104/2021 | OK246933 |
| VSP5105 | B.1.1.7 | hCoV-19/USA/PA-VSP5105/2021 | OK246934 |
| VSP5107 | B.1.1.7 | hCoV-19/USA/PA-VSP5107/2021 | OK246935 |
| VSP5110 | B.1.1.7 | hCoV-19/USA/PA-VSP5110/2021 | OK246936 |
| VSP5112 | B.1.1.7 | hCoV-19/USA/PA-VSP5112/2021 | OK246937 |
| VSP5113 | B.1.1.7 | hCoV-19/USA/PA-VSP5113/2021 | OK246938 |
| VSP5118 | B.1.1.7 | hCoV-19/USA/PA-VSP5118/2021 | OK246941 |
| VSP5119 | B.1.1.7 | hCoV-19/USA/PA-VSP5119/2021 | OK246942 |
| VSP5123 | B.1.1.7 | hCoV-19/USA/PA-VSP5123/2021 | OK246946 |

|         |         |                                                      |          |
|---------|---------|------------------------------------------------------|----------|
| VSP5124 | B.1.1.7 | hCoV-19/USA/PA-VSP5124/2021                          | OK246947 |
| VSP5126 | B.1.1.7 | hCoV-19/USA/PA-VSP5126/2021                          | OK246949 |
| VSP5128 | B.1.1.7 | hCoV-19/USA/PA-VSP5128/2021                          | OK246951 |
| VSP5129 | B.1.1.7 | hCoV-19/USA/PA-VSP5129/2021                          | OK246952 |
| VSP5131 | B.1.1.7 | hCoV-19/USA/PA-VSP5131/2021                          | OK246954 |
| VSP5132 | B.1.1.7 | hCoV-19/USA/PA-VSP5132/2021                          | OK246955 |
| VSP5133 | B.1.1.7 | hCoV-19/USA/PA-VSP5133/2021                          | OK246956 |
| VSP5138 | B.1.1.7 | hCoV-19/USA/PA-VSP5138/2021                          | OK246960 |
| VSP5140 | B.1.1.7 | hCoV-19/USA/PA-VSP5140/2021                          | OK246962 |
| VSP5151 | B.1.1.7 | hCoV-19/USA/NJ-VSP5151/2021                          | OK246967 |
| VSP5154 | B.1.1.7 | hCoV-19/USA/PA-VSP5154/2021                          | OK246968 |
| VSP5155 | B.1.1.7 | hCoV-19/USA/PA-VSP5155/2021                          | OK246969 |
| VSP5156 | B.1.1.7 | hCoV-19/USA/PA-VSP5156/2021                          | OK246970 |
| VSP5158 | B.1.1.7 | hCoV-19/USA/PA-VSP5158/2021                          | OK246972 |
| VSP5159 | B.1.1.7 | hCoV-19/USA/PA-VSP5159/2021                          | OK246973 |
| VSP5160 | B.1.1.7 | hCoV-19/USA/PA-VSP5160/2021                          | OK246974 |
| VSP5167 | B.1.1.7 | hCoV-19/USA/PA-VSP5167/2021                          | OK246980 |
| VSP5176 | B.1.1.7 | hCoV-19/USA/PA-VSP5176/2021                          | OK246986 |
| VSP5178 | B.1.1.7 | hCoV-19/USA/PA-VSP5178/2021                          | OK246987 |
| VSP5184 | B.1.1.7 | hCoV-19/USA/PA-VSP5184/2021                          | OK246990 |
| VSP5194 | B.1.1.7 | hCoV-19/USA/PA-VSP5194/2021                          | OK246998 |
| VSP5229 | B.1.1.7 | hCoV-19/USA/PA-VSP5229/2021                          | OK247017 |
| VSP7148 | B.1.1.7 | hCoV-19/USA/PA-VSP7148/2021                          | OM241203 |
| VSP7726 | B.1.1.7 | hCoV-19/USA/PA-VSP7726/2021                          | OM241300 |
| VSP8012 | B.1.1.7 | hCoV-19/USA/S10-ILLM/2021                            |          |
| VSP8017 | B.1.1.7 | hCoV-19/USA/S15-ILLM/2021                            |          |
| VSP8018 | B.1.1.7 | hCoV-19/USA/S16-ILLM/2021                            |          |
| VSP8019 | B.1.1.7 | hCoV-19/USA/S17-ILLM/2021                            |          |
| VSP8020 | B.1.1.7 | hCoV-19/USA/S18-ILLM/2021                            |          |
| VSP8022 | B.1.1.7 | hCoV-19/USA/S20-ILLM/2021                            |          |
| VSP8030 | B.1.1.7 | hCoV-19/USA/NJ-S30-ILLM/2021                         |          |
| VSP8034 | B.1.1.7 | hCoV-19/USA/NJ-S34-ILLM/2021                         |          |
| VSP8044 | B.1.1.7 | hCoV-19/USA/NJ-S44-ILLM/2021                         |          |
| VSP8047 | B.1.1.7 | hCoV-19/USA/NJ-S47-ILLM/2021                         |          |
| VSP8048 | B.1.1.7 | hCoV-19/USA/NJ-S48-ILLM/2021                         |          |
| VSP8052 | B.1.1.7 | hCoV-19/USA/PA-Jefferson_20210601_COVIDSeq2_S01/2021 |          |
| VSP8053 | B.1.1.7 | hCoV-19/USA/PA-Jefferson_20210601_COVIDSeq2_S02/2021 |          |
| VSP8054 | B.1.1.7 | hCoV-19/USA/PA-Jefferson_20210601_COVIDSeq2_S03/2021 |          |
| VSP8055 | B.1.1.7 | hCoV-19/USA/PA-Jefferson_20210601_COVIDSeq2_S04/2021 |          |
| VSP8057 | B.1.1.7 | hCoV-19/USA/PA-Jefferson_20210601_COVIDSeq2_S06/2021 |          |
| VSP8058 | B.1.1.7 | hCoV-19/USA/PA-Jefferson_20210601_COVIDSeq2_S07/2021 |          |
| VSP8059 | B.1.1.7 | hCoV-19/USA/PA-Jefferson_20210601_COVIDSeq2_S08/2021 |          |
| VSP8060 | B.1.1.7 | hCoV-19/USA/PA-Jefferson_20210601_COVIDSeq2_S09/2021 |          |
| VSP8061 | B.1.1.7 | hCoV-19/USA/PA-Jefferson_20210601_COVIDSeq2_S10/2021 |          |
| VSP8062 | B.1.1.7 | hCoV-19/USA/PA-Jefferson_20210601_COVIDSeq2_S11/2021 |          |
| VSP8063 | B.1.1.7 | hCoV-19/USA/PA-Jefferson_20210601_COVIDSeq2_S12/2021 |          |
| VSP8064 | B.1.1.7 | hCoV-19/USA/PA-Jefferson_20210601_COVIDSeq2_S13/2021 |          |
| VSP8065 | B.1.1.7 | hCoV-19/USA/PA-Jefferson_20210601_COVIDSeq2_S15/2021 |          |







|         |           |                                                      |          |
|---------|-----------|------------------------------------------------------|----------|
| VSP8413 | B.1.1.7   | hCOV-19/USA/PA-Jefferson_20210803_COVIDSeq14_39/2021 |          |
| VSP8498 | B.1.1.7   | hCOV-19/USA/PA-Jefferson_20210816_COVIDSeq16_36/2021 |          |
| VSP8517 | B.1.1.7   | hCOV-19/USA/PA-Jefferson_20210823_COVIDSeq17_09/2021 |          |
| VSP3484 | AY.5      | hCoV-19/USA/PA-VSP3484/2021                          | OM542172 |
| VSP3486 | AY.103    | hCoV-19/USA/PA-VSP3486/2021                          | OM542173 |
| VSP3566 | AY.75     | hCoV-19/USA/PA-VSP3566/2021                          | OM570130 |
| VSP3567 | AY.25     | hCoV-19/USA/PA-VSP3567/2021                          | OM570131 |
| VSP3572 | AY.25     | hCoV-19/USA/PA-VSP3572/2021                          | OM570132 |
| VSP7070 | AY.119    | hCoV-19/USA/PA-VSP7070/2021                          | OM241175 |
| VSP7072 | AY.103    | hCoV-19/USA/PA-VSP7072/2021                          | OM241176 |
| VSP7073 | AY.67     | hCoV-19/USA/PA-VSP7073/2021                          | OM241177 |
| VSP7075 | AY.3      | hCoV-19/USA/PA-VSP7075/2021                          | OM241178 |
| VSP7076 | B.1.617.2 | hCoV-19/USA/NJ-VSP7076/2021                          | OM241179 |
| VSP7080 | AY.103    | hCoV-19/USA/PA-VSP7080/2021                          | OM241180 |
| VSP7081 | AY.119    | hCoV-19/USA/PA-VSP7081/2021                          | OM241181 |
| VSP7082 | AY.114    | hCoV-19/USA/NJ-VSP7082/2021                          | OM241182 |
| VSP7083 | AY.3      | hCoV-19/USA/PA-VSP7083/2021                          | OM241183 |
| VSP7084 | AY.25     | hCoV-19/USA/PA-VSP7084/2021                          | OM241184 |
| VSP7087 | AY.4.2.1  | hCoV-19/USA/PA-VSP7087/2021                          | OM241185 |
| VSP7089 | AY.25     | hCoV-19/USA/PA-VSP7089/2021                          | OM241186 |
| VSP7090 | AY.119    | hCoV-19/USA/PA-VSP7090/2021                          | OM241187 |
| VSP7092 | AY.25     | hCoV-19/USA/PA-VSP7092/2021                          | OM241188 |
| VSP7093 | AY.44     | hCoV-19/USA/PA-VSP7093/2021                          | OM241189 |
| VSP7094 | AY.25     | hCoV-19/USA/NJ-VSP7094/2021                          | OM241190 |
| VSP7095 | B.1.617.2 | hCoV-19/USA/PA-VSP7095/2021                          | OM241191 |
| VSP7096 | AY.44     | hCoV-19/USA/PA-VSP7096/2021                          | OM241192 |
| VSP7097 | AY.26     | hCoV-19/USA/PA-VSP7097/2021                          | OM241193 |
| VSP7099 | AY.44     | hCoV-19/USA/PA-VSP7099/2021                          | OM241194 |
| VSP7101 | AY.103    | hCoV-19/USA/PA-VSP7101/2021                          | OM241195 |
| VSP7133 | AY.44     | hCoV-19/USA/PA-VSP7133/2021                          | OM241197 |
| VSP7137 | AY.44     | hCoV-19/USA/PA-VSP7137/2021                          | OM241198 |
| VSP7139 | AY.3      | hCoV-19/USA/PA-VSP7139/2021                          | OM241199 |
| VSP7140 | AY.25     | hCoV-19/USA/PA-VSP7140/2021                          | OM570163 |
| VSP7141 | AY.103    | hCoV-19/USA/PA-VSP7141/2021                          | OM241200 |
| VSP7142 | AY.25     | hCoV-19/USA/PA-VSP7142/2021                          | OM241201 |
| VSP7144 | AY.103    | hCoV-19/USA/PA-VSP7144/2021                          | OM570164 |
| VSP7145 | AY.5      | hCoV-19/USA/PA-VSP7145/2021                          | OM570165 |
| VSP7146 | AY.5      | hCoV-19/USA/PA-VSP7146/2021                          | OM241202 |
| VSP7147 | AY.103    | hCoV-19/USA/PA-VSP7147/2021                          | OM570166 |
| VSP7149 | AY.122.1  | hCoV-19/USA/PA-VSP7149/2021                          | OM241204 |
| VSP7150 | AY.103    | hCoV-19/USA/PA-VSP7150/2021                          | OM241205 |
| VSP7151 | AY.75     | hCoV-19/USA/PA-VSP7151/2021                          | OL673346 |
| VSP7152 | AY.25     | hCoV-19/USA/PA-VSP7152/2021                          | OM570167 |
| VSP7157 | AY.103    | hCoV-19/USA/PA-VSP7157/2021                          | OM241206 |
| VSP7159 | AY.3      | hCoV-19/USA/NJ-VSP7159/2021                          | OM241207 |
| VSP7161 | AY.103    | hCoV-19/USA/PA-VSP7161/2021                          | OM570168 |
| VSP7162 | AY.3      | hCoV-19/USA/PA-VSP7162/2021                          | OM241208 |
| VSP7163 | AY.44     | hCoV-19/USA/NJ-VSP7163/2021                          | OM241209 |

|         |           |                             |          |
|---------|-----------|-----------------------------|----------|
| VSP7164 | AY.25     | hCoV-19/USA/PA-VSP7164/2021 | OM570169 |
| VSP7165 | AY.103    | hCoV-19/USA/PA-VSP7165/2021 | OM241210 |
| VSP7166 | AY.103    | hCoV-19/USA/PA-VSP7166/2021 | OM570170 |
| VSP7167 | AY.75     | hCoV-19/USA/PA-VSP7167/2021 | OM570171 |
| VSP7168 | AY.103    | hCoV-19/USA/PA-VSP7168/2021 | OM241211 |
| VSP7169 | AY.3.1    | hCoV-19/USA/PA-VSP7169/2021 | OM241212 |
| VSP7170 | AY.25     | hCoV-19/USA/PA-VSP7170/2021 | OM241213 |
| VSP7171 | AY.25     | hCoV-19/USA/PA-VSP7171/2021 | OM570172 |
| VSP7172 | AY.3.1    | hCoV-19/USA/PA-VSP7172/2021 | OM241214 |
| VSP7173 | B.1.617.2 | hCoV-19/USA/PA-VSP7173/2021 | OM241215 |
| VSP7174 | AY.103    | hCoV-19/USA/PA-VSP7174/2021 | OM241216 |
| VSP7175 | AY.44     | hCoV-19/USA/PA-VSP7175/2021 | OM241217 |
| VSP7176 | AY.3      | hCoV-19/USA/PA-VSP7176/2021 | OM241218 |
| VSP7177 | AY.44     | hCoV-19/USA/PA-VSP7177/2021 | OM570173 |
| VSP7178 | AY.75     | hCoV-19/USA/PA-VSP7178/2021 | OM570174 |
| VSP7179 | AY.44     | hCoV-19/USA/PA-VSP7179/2021 | OM241219 |
| VSP7180 | AY.103    | hCoV-19/USA/PA-VSP7180/2021 | OM570175 |
| VSP7181 | AY.44     | hCoV-19/USA/PA-VSP7181/2021 | OM241220 |
| VSP7182 | AY.47     | hCoV-19/USA/PA-VSP7182/2021 | OM570176 |
| VSP7190 | AY.39     | hCoV-19/USA/PA-VSP7190/2021 | OM241223 |
| VSP7195 | B.1.617.2 | hCoV-19/USA/PA-VSP7195/2021 | OM241224 |
| VSP7196 | AY.119    | hCoV-19/USA/PA-VSP7196/2021 | OM570177 |
| VSP7241 | AY.25     | hCoV-19/USA/PA-VSP7241/2021 | OL673349 |
| VSP7243 | AY.46.1   | hCoV-19/USA/NJ-VSP7243/2021 | OL673350 |
| VSP7244 | AY.100    | hCoV-19/USA/PA-VSP7244/2021 | OL673351 |
| VSP7245 | AY.25     | hCoV-19/USA/PA-VSP7245/2021 | OL673352 |
| VSP7246 | AY.25     | hCoV-19/USA/PA-VSP7246/2021 | OL673353 |
| VSP7250 | AY.25     | hCoV-19/USA/NJ-VSP7250/2021 | OL673354 |
| VSP7252 | AY.103    | hCoV-19/USA/NJ-VSP7252/2021 | OL673355 |
| VSP7253 | AY.44     | hCoV-19/USA/NJ-VSP7253/2021 | OL673356 |
| VSP7259 | AY.25     | hCoV-19/USA/PA-VSP7259/2021 | OM570178 |
| VSP7262 | AY.25     | hCoV-19/USA/PA-VSP7262/2021 | OL673357 |
| VSP7265 | AY.44     | hCoV-19/USA/PA-VSP7265/2021 | OL673358 |
| VSP7266 | AY.107    | hCoV-19/USA/PA-VSP7266/2021 | OL673359 |
| VSP7267 | AY.25     | hCoV-19/USA/PA-VSP7267/2021 | OL673360 |
| VSP7268 | AY.25     | hCoV-19/USA/PA-VSP7268/2021 | OL673361 |
| VSP7269 | AY.25     | hCoV-19/USA/PA-VSP7269/2021 | OM570179 |
| VSP7271 | AY.75     | hCoV-19/USA/PA-VSP7271/2021 | OM570180 |
| VSP7274 | AY.100    | hCoV-19/USA/PA-VSP7274/2021 | OL673362 |
| VSP7276 | AY.25     | hCoV-19/USA/PA-VSP7276/2021 | OL673363 |
| VSP7277 | AY.3      | hCoV-19/USA/PA-VSP7277/2021 | OL673364 |
| VSP7278 | AY.98.1   | hCoV-19/USA/PA-VSP7278/2021 | OM570181 |
| VSP7279 | AY.75     | hCoV-19/USA/PA-VSP7279/2021 | OL673365 |
| VSP7280 | AY.103    | hCoV-19/USA/PA-VSP7280/2021 | OL673366 |
| VSP7281 | AY.26     | hCoV-19/USA/PA-VSP7281/2021 | OM241225 |
| VSP7282 | AY.103    | hCoV-19/USA/PA-VSP7282/2021 | OL673367 |
| VSP7283 | AY.119    | hCoV-19/USA/PA-VSP7283/2021 | OM570182 |
| VSP7284 | AY.25     | hCoV-19/USA/PA-VSP7284/2021 | OM570183 |

|         |         |                             |          |
|---------|---------|-----------------------------|----------|
| VSP7285 | AY.103  | hCoV-19/USA/PA-VSP7285/2021 | OL673368 |
| VSP7286 | AY.122  | hCoV-19/USA/PA-VSP7286/2021 | OL673369 |
| VSP7287 | AY.98.1 | hCoV-19/USA/PA-VSP7287/2021 | OM241226 |
| VSP7289 | AY.25   | hCoV-19/USA/PA-VSP7289/2021 | OM241227 |
| VSP7290 | AY.25   | hCoV-19/USA/PA-VSP7290/2021 | OL673370 |
| VSP7291 | AY.44   | hCoV-19/USA/PA-VSP7291/2021 | OM241228 |
| VSP7292 | AY.25   | hCoV-19/USA/PA-VSP7292/2021 | OL673371 |
| VSP7293 | AY.25   | hCoV-19/USA/PA-VSP7293/2021 | OL673372 |
| VSP7294 | AY.3.1  | hCoV-19/USA/PA-VSP7294/2021 | OL673373 |
| VSP7295 | AY.103  | hCoV-19/USA/PA-VSP7295/2021 | OL673374 |
| VSP7296 | AY.47   | hCoV-19/USA/PA-VSP7296/2021 | OM241229 |
| VSP7297 | AY.25   | hCoV-19/USA/PA-VSP7297/2021 | OL673375 |
| VSP7298 | AY.25   | hCoV-19/USA/PA-VSP7298/2021 | OL673376 |
| VSP7299 | AY.25   | hCoV-19/USA/PA-VSP7299/2021 | OL673377 |
| VSP7303 | AY.103  | hCoV-19/USA/PA-VSP7303/2021 | OL673378 |
| VSP7304 | AY.125  | hCoV-19/USA/PA-VSP7304/2021 | OM241230 |
| VSP7305 | AY.75   | hCoV-19/USA/PA-VSP7305/2021 | OL673379 |
| VSP7306 | AY.103  | hCoV-19/USA/PA-VSP7306/2021 | OM241231 |
| VSP7308 | AY.25   | hCoV-19/USA/PA-VSP7308/2021 | OL673380 |
| VSP7309 | AY.103  | hCoV-19/USA/PA-VSP7309/2021 | OM241232 |
| VSP7310 | AY.103  | hCoV-19/USA/NJ-VSP7310/2021 | OL673381 |
| VSP7311 | AY.26   | hCoV-19/USA/PA-VSP7311/2021 | OL673382 |
| VSP7312 | AY.44   | hCoV-19/USA/PA-VSP7312/2021 | OL673383 |
| VSP7313 | AY.103  | hCoV-19/USA/PA-VSP7313/2021 | OL673384 |
| VSP7314 | AY.25   | hCoV-19/USA/NJ-VSP7314/2021 | OL673385 |
| VSP7321 | AY.113  | hCoV-19/USA/PA-VSP7321/2021 | OL673386 |
| VSP7322 | AY.119  | hCoV-19/USA/PA-VSP7322/2021 | OM241233 |
| VSP7326 | AY.103  | hCoV-19/USA/NJ-VSP7326/2021 | OL673387 |
| VSP7327 | AY.103  | hCoV-19/USA/PA-VSP7327/2021 | OL673388 |
| VSP7328 | AY.103  | hCoV-19/USA/PA-VSP7328/2021 | OL673389 |
| VSP7329 | AY.25   | hCoV-19/USA/PA-VSP7329/2021 | OM241234 |
| VSP7330 | AY.39   | hCoV-19/USA/PA-VSP7330/2021 | OM241235 |
| VSP7332 | AY.25   | hCoV-19/USA/PA-VSP7332/2021 | OM241236 |
| VSP7333 | AY.44   | hCoV-19/USA/NJ-VSP7333/2021 | OL673390 |
| VSP7334 | AY.103  | hCoV-19/USA/PA-VSP7334/2021 | OL673391 |
| VSP7335 | AY.103  | hCoV-19/USA/PA-VSP7335/2021 | OL673392 |
| VSP7336 | AY.44   | hCoV-19/USA/PA-VSP7336/2021 | OL673393 |
| VSP7338 | AY.44   | hCoV-19/USA/NJ-VSP7338/2021 | OL673394 |
| VSP7339 | AY.107  | hCoV-19/USA/PA-VSP7339/2021 | OL673395 |
| VSP7340 | AY.44   | hCoV-19/USA/PA-VSP7340/2021 | OL673396 |
| VSP7341 | AY.103  | hCoV-19/USA/PA-VSP7341/2021 | OM241237 |
| VSP7344 | AY.34   | hCoV-19/USA/PA-VSP7344/2021 | OM241238 |
| VSP7349 | AY.103  | hCoV-19/USA/PA-VSP7349/2021 | OL673397 |
| VSP7350 | AY.103  | hCoV-19/USA/PA-VSP7350/2021 | OM241239 |
| VSP7352 | AY.103  | hCoV-19/USA/PA-VSP7352/2021 | OM241240 |
| VSP7353 | AY.3    | hCoV-19/USA/PA-VSP7353/2021 | OL673398 |
| VSP7354 | AY.119  | hCoV-19/USA/PA-VSP7354/2021 | OM241241 |
| VSP7355 | AY.25   | hCoV-19/USA/PA-VSP7355/2021 | OM241242 |

|         |           |                             |          |
|---------|-----------|-----------------------------|----------|
| VSP7356 | AY.25     | hCoV-19/USA/PA-VSP7356/2021 | OM241243 |
| VSP7357 | AY.20     | hCoV-19/USA/PA-VSP7357/2021 | OM241244 |
| VSP7358 | AY.3      | hCoV-19/USA/PA-VSP7358/2021 | OL673399 |
| VSP7360 | AY.103    | hCoV-19/USA/PA-VSP7360/2021 | OL673400 |
| VSP7361 | AY.25     | hCoV-19/USA/PA-VSP7361/2021 | OL673401 |
| VSP7362 | AY.119    | hCoV-19/USA/PA-VSP7362/2021 | OM241245 |
| VSP7363 | AY.103    | hCoV-19/USA/PA-VSP7363/2021 | OL673402 |
| VSP7365 | AY.122    | hCoV-19/USA/PA-VSP7365/2021 | OL673403 |
| VSP7383 | AY.103    | hCoV-19/USA/PA-VSP7383/2021 | OL673404 |
| VSP7384 | AY.46.1   | hCoV-19/USA/PA-VSP7384/2021 | OM241246 |
| VSP7385 | B.1.617.2 | hCoV-19/USA/PA-VSP7385/2021 | OM241247 |
| VSP7386 | AY.25     | hCoV-19/USA/PA-VSP7386/2021 | OL673405 |
| VSP7392 | AY.122    | hCoV-19/USA/PA-VSP7392/2021 | OM241248 |
| VSP7393 | AY.103    | hCoV-19/USA/PA-VSP7393/2021 | OL673406 |
| VSP7394 | AY.44     | hCoV-19/USA/PA-VSP7394/2021 | OL673407 |
| VSP7397 | AY.119    | hCoV-19/USA/PA-VSP7397/2021 | OL673408 |
| VSP7399 | AY.103    | hCoV-19/USA/PA-VSP7399/2021 | OL673409 |
| VSP7401 | AY.25     | hCoV-19/USA/PA-VSP7401/2021 | OL673410 |
| VSP7404 | AY.3.1    | hCoV-19/USA/PA-VSP7404/2021 | OM241249 |
| VSP7405 | AY.119    | hCoV-19/USA/PA-VSP7405/2021 | OL673411 |
| VSP7407 | AY.39     | hCoV-19/USA/DE-VSP7407/2021 | OL673412 |
| VSP7408 | AY.4      | hCoV-19/USA/PA-VSP7408/2021 | OM241250 |
| VSP7410 | AY.119    | hCoV-19/USA/PA-VSP7410/2021 | OM241251 |
| VSP7411 | AY.3      | hCoV-19/USA/PA-VSP7411/2021 | OL673413 |
| VSP7412 | AY.118    | hCoV-19/USA/PA-VSP7412/2021 | OM241252 |
| VSP7418 | AY.47     | hCoV-19/USA/PA-VSP7418/2021 | OM241253 |
| VSP7419 | AY.103    | hCoV-19/USA/PA-VSP7419/2021 | OM241254 |
| VSP7420 | AY.25     | hCoV-19/USA/PA-VSP7420/2021 | OM241255 |
| VSP7422 | AY.3.1    | hCoV-19/USA/PA-VSP7422/2021 | OM241256 |
| VSP7423 | AY.3      | hCoV-19/USA/PA-VSP7423/2021 | OM241257 |
| VSP7424 | AY.103    | hCoV-19/USA/PA-VSP7424/2021 | OM241258 |
| VSP7425 | AY.103    | hCoV-19/USA/PA-VSP7425/2021 | OM241259 |
| VSP7426 | AY.25     | hCoV-19/USA/NJ-VSP7426/2021 | OM241260 |
| VSP7427 | AY.103    | hCoV-19/USA/PA-VSP7427/2021 |          |
| VSP7431 | AY.103    | hCoV-19/USA/PA-VSP7431/2021 | OM241261 |
| VSP7434 | AY.44     | hCoV-19/USA/PA-VSP7434/2021 | OM241262 |
| VSP7435 | AY.25     | hCoV-19/USA/PA-VSP7435/2021 | OM241263 |
| VSP7437 | AY.103    | hCoV-19/USA/PA-VSP7437/2021 | OM241264 |
| VSP7438 | AY.25     | hCoV-19/USA/PA-VSP7438/2021 | OM241265 |
| VSP7442 | AY.44     | hCoV-19/USA/PA-VSP7442/2021 | OM241266 |
| VSP7444 | AY.103    | hCoV-19/USA/PA-VSP7444/2021 | OM241267 |
| VSP7446 | AY.3      | hCoV-19/USA/PA-VSP7446/2021 | OM241268 |
| VSP7447 | AY.44     | hCoV-19/USA/PA-VSP7447/2021 | OM241269 |
| VSP7448 | B.1.617.2 | hCoV-19/USA/PA-VSP7448/2021 | OM241270 |
| VSP7450 | AY.103    | hCoV-19/USA/PA-VSP7450/2021 | OM241271 |
| VSP7451 | AY.103    | hCoV-19/USA/PA-VSP7451/2021 | OM241272 |
| VSP7452 | AY.119    | hCoV-19/USA/NJ-VSP7452/2021 | OM241273 |
| VSP7454 | AY.44     | hCoV-19/USA/PA-VSP7454/2021 | OM241274 |

|         |           |                             |          |
|---------|-----------|-----------------------------|----------|
| VSP7456 | B.1.617.2 | hCoV-19/USA/PA-VSP7456/2021 | OM241275 |
| VSP7462 | AY.103    | hCoV-19/USA/PA-VSP7462/2021 | OM241276 |
| VSP7463 | AY.103    | hCoV-19/USA/PA-VSP7463/2021 | OM241277 |
| VSP7465 | AY.25     | hCoV-19/USA/PA-VSP7465/2021 | OM241278 |
| VSP7467 | AY.25     | hCoV-19/USA/PA-VSP7467/2021 | OL673414 |
| VSP7469 | B.1.617.2 | hCoV-19/USA/PA-VSP7469/2021 | OL673415 |
| VSP7471 | AY.103    | hCoV-19/USA/PA-VSP7471/2021 | OL673416 |
| VSP7473 | AY.103    | hCoV-19/USA/PA-VSP7473/2021 | OL673417 |
| VSP7474 | AY.47     | hCoV-19/USA/PA-VSP7474/2021 | OL673418 |
| VSP7476 | AY.47     | hCoV-19/USA/PA-VSP7476/2021 | OL673419 |
| VSP7477 | AY.98.1   | hCoV-19/USA/PA-VSP7477/2021 | OL673420 |
| VSP7479 | AY.103    | hCoV-19/USA/PA-VSP7479/2021 | OL673421 |
| VSP7486 | AY.110    | hCoV-19/USA/PA-VSP7486/2021 | OL673422 |
| VSP7500 | AY.3      | hCoV-19/USA/PA-VSP7500/2021 | OL673423 |
| VSP7501 | AY.44     | hCoV-19/USA/PA-VSP7501/2021 | OL673424 |
| VSP7502 | AY.3      | hCoV-19/USA/PA-VSP7502/2021 | OM241279 |
| VSP7506 | AY.3      | hCoV-19/USA/PA-VSP7506/2021 | OM241280 |
| VSP7508 | AY.3      | hCoV-19/USA/PA-VSP7508/2021 | OL673425 |
| VSP7512 | AY.3      | hCoV-19/USA/PA-VSP7512/2021 | OL673426 |
| VSP7515 | AY.25     | hCoV-19/USA/PA-VSP7515/2021 | OL673427 |
| VSP7516 | AY.113    | hCoV-19/USA/PA-VSP7516/2021 | OL673428 |
| VSP7518 | AY.107    | hCoV-19/USA/PA-VSP7518/2021 | OL673429 |
| VSP7521 | AY.118    | hCoV-19/USA/PA-VSP7521/2021 | OM241281 |
| VSP7526 | AY.25     | hCoV-19/USA/PA-VSP7526/2021 | OM241282 |
| VSP7528 | AY.119    | hCoV-19/USA/PA-VSP7528/2021 | OL673430 |
| VSP7529 | AY.103    | hCoV-19/USA/PA-VSP7529/2021 | OL673431 |
| VSP7530 | AY.25     | hCoV-19/USA/PA-VSP7530/2021 | OM241283 |
| VSP7534 | AY.25     | hCoV-19/USA/NJ-VSP7534/2021 | OL673432 |
| VSP7535 | AY.113    | hCoV-19/USA/PA-VSP7535/2021 | OL673433 |
| VSP7540 | AY.119    | hCoV-19/USA/PA-VSP7540/2021 | OL673434 |
| VSP7544 | B.1.617.2 | hCoV-19/USA/PA-VSP7544/2021 | OL673435 |
| VSP7545 | AY.25     | hCoV-19/USA/PA-VSP7545/2021 | OL673436 |
| VSP7546 | AY.125    | hCoV-19/USA/PA-VSP7546/2021 | OL673437 |
| VSP7547 | AY.103    | hCoV-19/USA/PA-VSP7547/2021 | OL673438 |
| VSP7556 | AY.26     | hCoV-19/USA/PA-VSP7556/2021 | OL673439 |
| VSP7558 | AY.20     | hCoV-19/USA/PA-VSP7558/2021 | OL673440 |
| VSP7560 | AY.103    | hCoV-19/USA/PA-VSP7560/2021 | OL673441 |
| VSP7562 | AY.103    | hCoV-19/USA/PA-VSP7562/2021 | OL673442 |
| VSP7566 | AY.103    | hCoV-19/USA/PA-VSP7566/2021 | OL673443 |
| VSP7568 | AY.44     | hCoV-19/USA/NJ-VSP7568/2021 | OL673444 |
| VSP7572 | AY.44     | hCoV-19/USA/PA-VSP7572/2021 | OL673445 |
| VSP7573 | AY.3      | hCoV-19/USA/PA-VSP7573/2021 | OL673446 |
| VSP7574 | AY.39.1   | hCoV-19/USA/PA-VSP7574/2021 | OL673447 |
| VSP7579 | AY.25     | hCoV-19/USA/PA-VSP7579/2021 | OL673448 |
| VSP7580 | AY.39     | hCoV-19/USA/NJ-VSP7580/2021 | OL673449 |
| VSP7582 | AY.103    | hCoV-19/USA/NJ-VSP7582/2021 | OL673450 |
| VSP7584 | AY.3      | hCoV-19/USA/PA-VSP7584/2021 | OL673451 |
| VSP7586 | AY.39     | hCoV-19/USA/PA-VSP7586/2021 | OL673452 |

|         |           |                             |          |
|---------|-----------|-----------------------------|----------|
| VSP7587 | AY.39     | hCoV-19/USA/PA-VSP7587/2021 | OL673453 |
| VSP7589 | AY.103    | hCoV-19/USA/PA-VSP7589/2021 | OL673454 |
| VSP7590 | AY.103    | hCoV-19/USA/PA-VSP7590/2021 | OL673455 |
| VSP7591 | AY.93     | hCoV-19/USA/NJ-VSP7591/2021 | OL673456 |
| VSP7592 | B.1.617.2 | hCoV-19/USA/PA-VSP7592/2021 | OL673457 |
| VSP7593 | AY.119    | hCoV-19/USA/PA-VSP7593/2021 | OL673458 |
| VSP7596 | AY.39.1   | hCoV-19/USA/PA-VSP7596/2021 | OL673459 |
| VSP7600 | AY.44     | hCoV-19/USA/NJ-VSP7600/2021 | OL673460 |
| VSP7602 | AY.44     | hCoV-19/USA/PA-VSP7602/2021 | OL673461 |
| VSP7603 | AY.103    | hCoV-19/USA/PA-VSP7603/2021 | OL673462 |
| VSP7607 | AY.3.1    | hCoV-19/USA/PA-VSP7607/2021 | OL673463 |
| VSP7608 | AY.119    | hCoV-19/USA/PA-VSP7608/2021 | OL673464 |
| VSP7614 | AY.119    | hCoV-19/USA/PA-VSP7614/2021 | OL673465 |
| VSP7616 | AY.3      | hCoV-19/USA/PA-VSP7616/2021 | OL673466 |
| VSP7618 | AY.25     | hCoV-19/USA/PA-VSP7618/2021 | OL673467 |
| VSP7619 | AY.25     | hCoV-19/USA/PA-VSP7619/2021 | OL673468 |
| VSP7621 | AY.25     | hCoV-19/USA/NJ-VSP7621/2021 | OL673469 |
| VSP7623 | AY.119    | hCoV-19/USA/PA-VSP7623/2021 | OL673470 |
| VSP7624 | AY.122    | hCoV-19/USA/PA-VSP7624/2021 | OL673471 |
| VSP7626 | AY.3      | hCoV-19/USA/NJ-VSP7626/2021 | OL673472 |
| VSP7627 | B.1.617.2 | hCoV-19/USA/PA-VSP7627/2021 | OL673473 |
| VSP7630 | AY.103    | hCoV-19/USA/PA-VSP7630/2021 | OL673474 |
| VSP7631 | AY.25     | hCoV-19/USA/PA-VSP7631/2021 | OL673475 |
| VSP7633 | AY.43     | hCoV-19/USA/PA-VSP7633/2021 | OL673476 |
| VSP7637 | AY.3      | hCoV-19/USA/PA-VSP7637/2021 | OL673477 |
| VSP7638 | AY.103    | hCoV-19/USA/PA-VSP7638/2021 | OL673478 |
| VSP7639 | AY.122    | hCoV-19/USA/PA-VSP7639/2021 | OL673479 |
| VSP7640 | AY.103    | hCoV-19/USA/PA-VSP7640/2021 | OL673480 |
| VSP7641 | AY.25     | hCoV-19/USA/PA-VSP7641/2021 | OL673481 |
| VSP7647 | AY.103    | hCoV-19/USA/PA-VSP7647/2021 | OL673482 |
| VSP7656 | AY.25     | hCoV-19/USA/PA-VSP7656/2021 | OL673483 |
| VSP7658 | AY.103    | hCoV-19/USA/PA-VSP7658/2021 | OL673484 |
| VSP7671 | AY.119    | hCoV-19/USA/PA-VSP7671/2021 | OM241284 |
| VSP7673 | AY.3      | hCoV-19/USA/PA-VSP7673/2021 | OL673485 |
| VSP7676 | AY.44     | hCoV-19/USA/PA-VSP7676/2021 | OL673486 |
| VSP7681 | AY.122    | hCoV-19/USA/NJ-VSP7681/2021 | OL673487 |
| VSP7682 | AY.44     | hCoV-19/USA/PA-VSP7682/2021 | OL673488 |
| VSP7683 | AY.119    | hCoV-19/USA/DE-VSP7683/2021 | OL673489 |
| VSP7684 | AY.25     | hCoV-19/USA/PA-VSP7684/2021 |          |
| VSP7685 | AY.44     | hCoV-19/USA/PA-VSP7685/2021 |          |
| VSP7686 | AY.47     | hCoV-19/USA/PA-VSP7686/2021 |          |
| VSP7707 | AY.3      | hCoV-19/USA/NJ-VSP7707/2021 | OM241285 |
| VSP7710 | B.1.617.2 | hCoV-19/USA/PA-VSP7710/2021 | OM241286 |
| VSP7711 | AY.44     | hCoV-19/USA/PA-VSP7711/2021 | OM241287 |
| VSP7712 | AY.103    | hCoV-19/USA/PA-VSP7712/2021 | OM241288 |
| VSP7713 | AY.3      | hCoV-19/USA/PA-VSP7713/2021 | OM241289 |
| VSP7714 | B.1.617.2 | hCoV-19/USA/PA-VSP7714/2021 | OM241290 |
| VSP7715 | AY.44     | hCoV-19/USA/PA-VSP7715/2021 | OM241291 |

|         |           |                             |          |
|---------|-----------|-----------------------------|----------|
| VSP7716 | AY.103    | hCoV-19/USA/PA-VSP7716/2021 | OM241292 |
| VSP7717 | AY.69     | hCoV-19/USA/PA-VSP7717/2021 | OM241293 |
| VSP7718 | AY.47     | hCoV-19/USA/NJ-VSP7718/2021 | OM241294 |
| VSP7720 | AY.4      | hCoV-19/USA/NJ-VSP7720/2021 | OM241295 |
| VSP7721 | AY.103    | hCoV-19/USA/PA-VSP7721/2021 | OM241296 |
| VSP7722 | AY.3      | hCoV-19/USA/PA-VSP7722/2021 | OM241297 |
| VSP7723 | AY.119    | hCoV-19/USA/PA-VSP7723/2021 | OM241298 |
| VSP7725 | AY.103    | hCoV-19/USA/PA-VSP7725/2021 | OM241299 |
| VSP7727 | AY.3      | hCoV-19/USA/PA-VSP7727/2021 | OM241301 |
| VSP7728 | AY.103    | hCoV-19/USA/PA-VSP7728/2021 | OM241302 |
| VSP7729 | AY.25     | hCoV-19/USA/NJ-VSP7729/2021 | OM241303 |
| VSP7730 | AY.103    | hCoV-19/USA/PA-VSP7730/2021 | OM241304 |
| VSP7731 | AY.25     | hCoV-19/USA/PA-VSP7731/2021 | OM241305 |
| VSP7733 | AY.119    | hCoV-19/USA/PA-VSP7733/2021 | OM241306 |
| VSP7734 | AY.25     | hCoV-19/USA/NJ-VSP7734/2021 | OM241307 |
| VSP7735 | AY.25     | hCoV-19/USA/PA-VSP7735/2021 | OM241308 |
| VSP7736 | AY.25     | hCoV-19/USA/PA-VSP7736/2021 | OM241309 |
| VSP7737 | AY.3      | hCoV-19/USA/PA-VSP7737/2021 | OM241310 |
| VSP7738 | AY.122    | hCoV-19/USA/PA-VSP7738/2021 | OM241311 |
| VSP7739 | AY.103    | hCoV-19/USA/NJ-VSP7739/2021 | OM241312 |
| VSP7743 | AY.43     | hCoV-19/USA/PA-VSP7743/2021 | OM241313 |
| VSP7744 | AY.43     | hCoV-19/USA/PA-VSP7744/2021 | OM241314 |
| VSP7745 | AY.39     | hCoV-19/USA/NJ-VSP7745/2021 | OM241315 |
| VSP7747 | AY.103    | hCoV-19/USA/PA-VSP7747/2021 | OM241316 |
| VSP7748 | AY.119    | hCoV-19/USA/PA-VSP7748/2021 | OM241317 |
| VSP7750 | AY.39     | hCoV-19/USA/NJ-VSP7750/2021 | OM241318 |
| VSP7751 | AY.25     | hCoV-19/USA/PA-VSP7751/2021 | OM241319 |
| VSP7752 | B.1.617.2 | hCoV-19/USA/PA-VSP7752/2021 | OM241320 |
| VSP7753 | B.1.617.2 | hCoV-19/USA/PA-VSP7753/2021 | OM241321 |
| VSP7755 | AY.103    | hCoV-19/USA/PA-VSP7755/2021 | OM241322 |
| VSP7756 | AY.103    | hCoV-19/USA/NJ-VSP7756/2021 | OM241323 |
| VSP7757 | AY.25     | hCoV-19/USA/NJ-VSP7757/2021 | OM241324 |
| VSP7758 | B.1.617.2 | hCoV-19/USA/PA-VSP7758/2021 | OM241325 |
| VSP7759 | AY.4      | hCoV-19/USA/NJ-VSP7759/2021 | OM241326 |
| VSP7760 | AY.4      | hCoV-19/USA/PA-VSP7760/2021 | OM241327 |
| VSP7761 | AY.25     | hCoV-19/USA/PA-VSP7761/2021 | OM241328 |
| VSP7764 | B.1.617.2 | hCoV-19/USA/PA-VSP7764/2021 | OM241329 |
| VSP7765 | AY.103    | hCoV-19/USA/NJ-VSP7765/2021 | OM241330 |
| VSP7766 | AY.103    | hCoV-19/USA/PA-VSP7766/2021 | OM241331 |
| VSP7767 | AY.44     | hCoV-19/USA/PA-VSP7767/2021 | OM241332 |
| VSP7768 | AY.44     | hCoV-19/USA/PA-VSP7768/2021 | OM241333 |
| VSP7769 | AY.3      | hCoV-19/USA/PA-VSP7769/2021 | OM241334 |
| VSP7770 | AY.3      | hCoV-19/USA/PA-VSP7770/2021 | OM241335 |
| VSP7771 | AY.25     | hCoV-19/USA/NJ-VSP7771/2021 | OM241336 |
| VSP7772 | AY.25     | hCoV-19/USA/PA-VSP7772/2021 | OM241337 |
| VSP7773 | AY.25     | hCoV-19/USA/PA-VSP7773/2021 | OM241338 |
| VSP7774 | AY.4      | hCoV-19/USA/NJ-VSP7774/2021 | OM241339 |
| VSP7775 | AY.103    | hCoV-19/USA/PA-VSP7775/2021 | OM241340 |

|         |           |                             |          |
|---------|-----------|-----------------------------|----------|
| VSP7776 | AY.3      | hCoV-19/USA/PA-VSP7776/2021 | OM241341 |
| VSP7777 | AY.44     | hCoV-19/USA/PA-VSP7777/2021 | OM241342 |
| VSP7778 | AY.25     | hCoV-19/USA/PA-VSP7778/2021 | OM241343 |
| VSP7779 | AY.103    | hCoV-19/USA/PA-VSP7779/2021 | OM241344 |
| VSP7780 | AY.103    | hCoV-19/USA/PA-VSP7780/2021 | OM241345 |
| VSP7781 | AY.25     | hCoV-19/USA/NJ-VSP7781/2021 | OM241346 |
| VSP7782 | AY.44     | hCoV-19/USA/PA-VSP7782/2021 | OM241347 |
| VSP7784 | B.1.617.2 | hCoV-19/USA/NJ-VSP7784/2021 | OM241348 |
| VSP7785 | AY.25     | hCoV-19/USA/PA-VSP7785/2021 | OM241349 |
| VSP7786 | AY.25     | hCoV-19/USA/PA-VSP7786/2021 | OM241350 |
| VSP7787 | AY.44     | hCoV-19/USA/PA-VSP7787/2021 | OM241351 |
| VSP7788 | AY.42     | hCoV-19/USA/PA-VSP7788/2021 | OM241352 |
| VSP7789 | AY.122.1  | hCoV-19/USA/PA-VSP7789/2021 | OM241353 |
| VSP7791 | AY.25     | hCoV-19/USA/PA-VSP7791/2021 | OM241354 |
| VSP7792 | AY.103    | hCoV-19/USA/PA-VSP7792/2021 | OM241355 |
| VSP7793 | AY.103    | hCoV-19/USA/NJ-VSP7793/2021 | OM241356 |
| VSP7796 | AY.103    | hCoV-19/USA/NJ-VSP7796/2021 | OM241357 |
| VSP7798 | B.1.617.2 | hCoV-19/USA/PA-VSP7798/2021 | OM241358 |
| VSP7799 | AY.44     | hCoV-19/USA/PA-VSP7799/2021 | OM241359 |
| VSP7800 | B.1.617.2 | hCoV-19/USA/PA-VSP7800/2021 | OM241360 |
| VSP7801 | AY.103    | hCoV-19/USA/NJ-VSP7801/2021 | OM241361 |
| VSP7802 | AY.39     | hCoV-19/USA/PA-VSP7802/2021 | OM241362 |
| VSP7803 | AY.42     | hCoV-19/USA/PA-VSP7803/2021 | OM241363 |
| VSP7804 | AY.44     | hCoV-19/USA/PA-VSP7804/2021 | OM241364 |
| VSP7805 | AY.59     | hCoV-19/USA/PA-VSP7805/2021 | OM241365 |
| VSP7806 | AY.4      | hCoV-19/USA/PA-VSP7806/2021 | OM241366 |
| VSP7807 | AY.39     | hCoV-19/USA/PA-VSP7807/2021 | OM241367 |
| VSP7808 | AY.39     | hCoV-19/USA/PA-VSP7808/2021 | OM241368 |
| VSP7809 | AY.42     | hCoV-19/USA/PA-VSP7809/2021 | OM241369 |
| VSP7811 | AY.44     | hCoV-19/USA/PA-VSP7811/2021 | OM241370 |
| VSP7812 | AY.25     | hCoV-19/USA/PA-VSP7812/2021 | OM241371 |
| VSP7813 | AY.25     | hCoV-19/USA/PA-VSP7813/2021 | OM241372 |
| VSP7834 | B.1.617.2 | hCoV-19/USA/PA-VSP7834/2021 | OM241373 |
| VSP7835 | AY.103    | hCoV-19/USA/PA-VSP7835/2021 | OM241374 |
| VSP7836 | AY.122    | hCoV-19/USA/PA-VSP7836/2021 | OM241375 |
| VSP7837 | AY.3      | hCoV-19/USA/PA-VSP7837/2021 | OM241376 |
| VSP7838 | AY.103    | hCoV-19/USA/PA-VSP7838/2021 | OM241377 |
| VSP7862 | AY.44     | hCoV-19/USA/PA-VSP7862/2021 | OM241378 |
| VSP7866 | AY.107    | hCoV-19/USA/PA-VSP7866/2021 | OM241379 |
| VSP7867 | AY.107    | hCoV-19/USA/PA-VSP7867/2021 | OM241380 |
| VSP7870 | AY.119    | hCoV-19/USA/PA-VSP7870/2021 | OM241381 |
| VSP7871 | AY.103    | hCoV-19/USA/PA-VSP7871/2021 | OM241382 |
| VSP7872 | AY.103    | hCoV-19/USA/NJ-VSP7872/2021 | OM241383 |
| VSP7873 | AY.43     | hCoV-19/USA/PA-VSP7873/2021 | OM241384 |
| VSP7874 | AY.25     | hCoV-19/USA/NJ-VSP7874/2021 | OM241385 |
| VSP7875 | AY.33     | hCoV-19/USA/PA-VSP7875/2021 | OM241386 |
| VSP7876 | AY.75     | hCoV-19/USA/PA-VSP7876/2021 | OM241387 |
| VSP7885 | AY.3.1    | hCoV-19/USA/PA-VSP7885/2021 | OM241388 |

|         |           |                             |          |
|---------|-----------|-----------------------------|----------|
| VSP7886 | AY.25     | hCoV-19/USA/PA-VSP7886/2021 | OM241389 |
| VSP7887 | AY.44     | hCoV-19/USA/PA-VSP7887/2021 | OM241390 |
| VSP7888 | AY.25     | hCoV-19/USA/PA-VSP7888/2021 | OM241391 |
| VSP7889 | B.1.617.2 | hCoV-19/USA/PA-VSP7889/2021 | OM241392 |
| VSP7892 | AY.25     | hCoV-19/USA/PA-VSP7892/2021 | OM241393 |
| VSP7893 | AY.118    | hCoV-19/USA/PA-VSP7893/2021 | OM241394 |
| VSP7894 | AY.120    | hCoV-19/USA/PA-VSP7894/2021 | OM241395 |
| VSP7895 | AY.120    | hCoV-19/USA/PA-VSP7895/2021 | OM241396 |
| VSP7896 | AY.25     | hCoV-19/USA/PA-VSP7896/2021 | OM241397 |
| VSP7897 | AY.25     | hCoV-19/USA/PA-VSP7897/2021 | OM241398 |
| VSP7898 | AY.25     | hCoV-19/USA/PA-VSP7898/2021 | OM241399 |
| VSP7899 | AY.113    | hCoV-19/USA/PA-VSP7899/2021 | OM241400 |
| VSP7900 | AY.119    | hCoV-19/USA/PA-VSP7900/2021 | OM241401 |
| VSP7901 | AY.4      | hCoV-19/USA/PA-VSP7901/2021 | OM241402 |
| VSP7904 | AY.119    | hCoV-19/USA/PA-VSP7904/2021 | OM241403 |
| VSP7905 | B.1.617.2 | hCoV-19/USA/NJ-VSP7905/2021 | OM241404 |
| VSP7906 | B.1.617.2 | hCoV-19/USA/NJ-VSP7906/2021 | OM241405 |
| VSP7907 | AY.103    | hCoV-19/USA/NJ-VSP7907/2021 | OM241406 |
| VSP7913 | AY.103    | hCoV-19/USA/PA-VSP7913/2021 | OM241407 |
| VSP7915 | AY.26     | hCoV-19/USA/PA-VSP7915/2021 | OM241408 |
| VSP7922 | AY.25     | hCoV-19/USA/NJ-VSP7922/2021 | OM241409 |
| VSP7925 | B.1.617.2 | hCoV-19/USA/PA-VSP7925/2021 | OM241410 |
| VSP7929 | AY.25     | hCoV-19/USA/NJ-VSP7929/2021 | OM241411 |
| VSP7930 | AY.59     | hCoV-19/USA/PA-VSP7930/2021 | OM241412 |
| VSP7931 | AY.44     | hCoV-19/USA/PA-VSP7931/2021 | OM241413 |
| VSP7932 | AY.103    | hCoV-19/USA/PA-VSP7932/2021 | OM241414 |
| VSP7934 | AY.103    | hCoV-19/USA/NJ-VSP7934/2021 | OM241415 |
| VSP7939 | B.1.617.2 | hCoV-19/USA/PA-VSP7939/2021 | OM241416 |
| VSP7940 | AY.47     | hCoV-19/USA/PA-VSP7940/2021 | OM241417 |
| VSP7941 | AY.103    | hCoV-19/USA/PA-VSP7941/2021 | OM241418 |
| VSP7945 | AY.114    | hCoV-19/USA/PA-VSP7945/2021 | OM241419 |
| VSP7946 | AY.39     | hCoV-19/USA/PA-VSP7946/2021 | OM241420 |
| VSP7947 | B.1.617.2 | hCoV-19/USA/PA-VSP7947/2021 | OM241421 |
| VSP7949 | AY.25     | hCoV-19/USA/PA-VSP7949/2021 | OM241422 |
| VSP7950 | AY.103    | hCoV-19/USA/PA-VSP7950/2021 | OM241423 |
| VSP7952 | AY.103    | hCoV-19/USA/PA-VSP7952/2021 | OM241424 |
| VSP7954 | AY.59     | hCoV-19/USA/PA-VSP7954/2021 | OM241425 |
| VSP7956 | AY.103    | hCoV-19/USA/PA-VSP7956/2021 | OM241426 |
| VSP7957 | AY.103    | hCoV-19/USA/NJ-VSP7957/2021 | OM241427 |
| VSP7958 | AY.78     | hCoV-19/USA/PA-VSP7958/2021 | OM241428 |
| VSP7959 | AY.25     | hCoV-19/USA/NJ-VSP7959/2021 | OM241429 |
| VSP7961 | B.1.617.2 | hCoV-19/USA/PA-VSP7961/2021 | OM241430 |
| VSP7962 | AY.25     | hCoV-19/USA/PA-VSP7962/2021 | OM241431 |
| VSP7963 | AY.103    | hCoV-19/USA/PA-VSP7963/2021 | OM241432 |
| VSP7966 | AY.44     | hCoV-19/USA/PA-VSP7966/2021 | OM241433 |
| VSP7967 | AY.25     | hCoV-19/USA/PA-VSP7967/2021 | OM241434 |
| VSP7970 | AY.119    | hCoV-19/USA/NJ-VSP7970/2021 | OM241435 |
| VSP7971 | AY.103    | hCoV-19/USA/PA-VSP7971/2021 | OM241436 |

|          |           |                              |          |
|----------|-----------|------------------------------|----------|
| VSP7974  | AY.103    | hCoV-19/USA/PA-VSP7974/2021  | OM241437 |
| VSP7975  | AY.103    | hCoV-19/USA/PA-VSP7975/2021  | OM241438 |
| VSP7976  | AY.46.6   | hCoV-19/USA/NJ-VSP7976/2021  | OM241439 |
| VSP7979  | AY.25     | hCoV-19/USA/PA-VSP7979/2021  | OM241440 |
| VSP7980  | AY.3      | hCoV-19/USA/PA-VSP7980/2021  | OM241441 |
| VSP7983  | AY.43     | hCoV-19/USA/PA-VSP7983/2021  | OM241442 |
| VSP7984  | AY.44     | hCoV-19/USA/PA-VSP7984/2021  | OM241443 |
| VSP7985  | B.1.617.2 | hCoV-19/USA/PA-VSP7985/2021  | OM241444 |
| VSP7986  | AY.78     | hCoV-19/USA/PA-VSP7986/2021  | OM241445 |
| VSP7988  | AY.25     | hCoV-19/USA/NJ-VSP7988/2021  | OM241446 |
| VSP7989  | AY.39     | hCoV-19/USA/NJ-VSP7989/2021  | OM241447 |
| VSP7990  | AY.3      | hCoV-19/USA/PA-VSP7990/2021  | OM241448 |
| VSP7991  | AY.95     | hCoV-19/USA/PA-VSP7991/2021  | OM241449 |
| VSP7992  | AY.25     | hCoV-19/USA/PA-VSP7992/2021  | OM241450 |
| VSP7993  | AY.25     | hCoV-19/USA/NJ-VSP7993/2021  | OM241451 |
| VSP7995  | AY.103    | hCoV-19/USA/PA-VSP7995/2021  | OM241452 |
| VSP7996  | AY.25     | hCoV-19/USA/NJ-VSP7996/2021  | OM570184 |
| VSP10022 | AY.25     | hCoV-19/USA/PA-VSP10022/2021 | OM241104 |
| VSP10024 | B.1.617.2 | hCoV-19/USA/PA-VSP10024/2021 | OM241105 |
| VSP10025 | AY.119    | hCoV-19/USA/PA-VSP10025/2021 | OM241106 |
| VSP10026 | AY.25     | hCoV-19/USA/PA-VSP10026/2021 | OM241107 |
| VSP10027 | AY.39     | hCoV-19/USA/PA-VSP10027/2021 | OM241108 |
| VSP10040 | AY.44     | hCoV-19/USA/PA-VSP10040/2021 | OM541952 |
