# Supplementary material for: Multiple Introductions of SARS-CoV-2 Alpha and Delta Variants into White-Tailed Deer in Pennsylvania
Source: bioRxiv or medRxiv preprint supplement (doi:10.1101/2022.02.17.22270679), 2022-05-13
Supplement: Supplementary file [file media-2.pdf]

We gratefully acknowledge the following Authors from the Originating laboratories responsible for obtaining the specimens, as well as the Submitting laboratories where the genome data were generated and shared via GISAID, on which this research is based.

All Submitters of data may be contacted directly via [www.gisaid.org](http://www.gisaid.org)

Authors are sorted alphabetically.

| Accession ID                                                                                                                                                                                                                                                                                                                                                                                                                                                                                                                                                                                                                                                                                                                                                                                                                                                                                                                                                                                                                                                                                                                                                                                                                                                                                                                                                                                                                                                                                                                                                                                                                                                 | Originating Laboratory                                  | Submitting Laboratory                                              | Authors                                                                                                                                                                                                                                                                                                     |
|--------------------------------------------------------------------------------------------------------------------------------------------------------------------------------------------------------------------------------------------------------------------------------------------------------------------------------------------------------------------------------------------------------------------------------------------------------------------------------------------------------------------------------------------------------------------------------------------------------------------------------------------------------------------------------------------------------------------------------------------------------------------------------------------------------------------------------------------------------------------------------------------------------------------------------------------------------------------------------------------------------------------------------------------------------------------------------------------------------------------------------------------------------------------------------------------------------------------------------------------------------------------------------------------------------------------------------------------------------------------------------------------------------------------------------------------------------------------------------------------------------------------------------------------------------------------------------------------------------------------------------------------------------------|---------------------------------------------------------|--------------------------------------------------------------------|-------------------------------------------------------------------------------------------------------------------------------------------------------------------------------------------------------------------------------------------------------------------------------------------------------------|
| EPI_ISL_5804716, EPI_ISL_5804717, EPI_ISL_5804718, EPI_ISL_5804719, EPI_ISL_5804720, EPI_ISL_5804721, EPI_ISL_5804722, EPI_ISL_5804723, EPI_ISL_5804724, EPI_ISL_5804725, EPI_ISL_5804726, EPI_ISL_5804727, EPI_ISL_5804728, EPI_ISL_5804729, EPI_ISL_5804730, EPI_ISL_5804731, EPI_ISL_5804732, EPI_ISL_5804733, EPI_ISL_5804734, EPI_ISL_5804735, EPI_ISL_5804736, EPI_ISL_5804737, EPI_ISL_5804738, EPI_ISL_5804739, EPI_ISL_5804740, EPI_ISL_5804741, EPI_ISL_5804742, EPI_ISL_5804743, EPI_ISL_5804744, EPI_ISL_5804745, EPI_ISL_5804746, EPI_ISL_5804747, EPI_ISL_5804748, EPI_ISL_5804749, EPI_ISL_5804750, EPI_ISL_5804751, EPI_ISL_5804752, EPI_ISL_5804753, EPI_ISL_5804754, EPI_ISL_5804755, EPI_ISL_5804756, EPI_ISL_5804757, EPI_ISL_5804758, EPI_ISL_5804759, EPI_ISL_5804760, EPI_ISL_5804761, EPI_ISL_5804762, EPI_ISL_5804763, EPI_ISL_5804764, EPI_ISL_5804765, EPI_ISL_5804766, EPI_ISL_5804767, EPI_ISL_5804768, EPI_ISL_5804769, EPI_ISL_5804770, EPI_ISL_5804771, EPI_ISL_5804772, EPI_ISL_5804773, EPI_ISL_5804774, EPI_ISL_5804775, EPI_ISL_5804776, EPI_ISL_5804777, EPI_ISL_5804778, EPI_ISL_5804779, EPI_ISL_5804780, EPI_ISL_5804781, EPI_ISL_5804782, EPI_ISL_5804783, EPI_ISL_5804784, EPI_ISL_5804785, EPI_ISL_5804786, EPI_ISL_5804787, EPI_ISL_6425266, EPI_ISL_6425267, EPI_ISL_6425268, EPI_ISL_6425269, EPI_ISL_6425270, EPI_ISL_6425271, EPI_ISL_6425272, EPI_ISL_6425273, EPI_ISL_6425274, EPI_ISL_6425275, EPI_ISL_6425276, EPI_ISL_6425277, EPI_ISL_6425278, EPI_ISL_6425279, EPI_ISL_6425280, EPI_ISL_6425281, EPI_ISL_6425282, EPI_ISL_6425283, EPI_ISL_6425284, EPI_ISL_6425285, EPI_ISL_6425286, EPI_ISL_6425287 | Department of Natural Resources, IA                     | Pennsylvania State Laboratory                                      | Meera Surendran Nair; Suresh Kuchipudi; Vivek Kapur                                                                                                                                                                                                                                                         |
| EPI_ISL_4847031, EPI_ISL_4878314, EPI_ISL_4878315, EPI_ISL_4878322                                                                                                                                                                                                                                                                                                                                                                                                                                                                                                                                                                                                                                                                                                                                                                                                                                                                                                                                                                                                                                                                                                                                                                                                                                                                                                                                                                                                                                                                                                                                                                                           | The Ohio State University Infectious Diseases Institute | The Ohio State University Applied Microbiology Services Laboratory | Amanda M. Williams; Andrew S. Bowman; Christopher Madden; Dakota L. Sizemore; Devra Huey; Dillon S. McBride; Emily R. Love; Jacob W. Smith; Jaqueline M. Nolting; Kerrie M. Franzen; Mary L. Killian; Mia Torchetti; Patricia Dennis; Seth A. Faith; Suelee Robbe-Austerman; Tod P. Stuber; Vanessa L. Hale |
| EPI_ISL_4847029, EPI_ISL_4847030, EPI_ISL_4847032, EPI_ISL_4847033, EPI_ISL_4878316, EPI_ISL_4878317, EPI_ISL_4878318, EPI_ISL_4878319, EPI_ISL_4878320, EPI_ISL_4878321                                                                                                                                                                                                                                                                                                                                                                                                                                                                                                                                                                                                                                                                                                                                                                                                                                                                                                                                                                                                                                                                                                                                                                                                                                                                                                                                                                                                                                                                                     | The Ohio State University Infectious Diseases Institute | USDA National Veterinary Services Laboratory                       | Amanda M. Williams; Andrew S. Bowman; Christopher Madden; Dakota L. Sizemore; Devra Huey; Dillon S. McBride; Emily R. Love; Jacob W. Smith; Jaqueline M. Nolting; Kerrie M. Franzen; Mary L. Killian; Mia Torchetti; Patricia Dennis; Seth A. Faith; Suelee Robbe-Austerman; Tod P. Stuber; Vanessa L. Hale |
