# Supplementary material for: Multiple Introductions of SARS-CoV-2 Alpha and Delta Variants into White-Tailed Deer in Pennsylvania
Source: bioRxiv or medRxiv preprint supplement (doi:10.1101/2022.02.17.22270679), 2022-05-13
Supplement: Supplementary file [file media-3.pdf]

Table S5. Key materials and resources

| <b>Reagent or Resource</b>                       | <b>Source</b>                                | <b>Identifier</b> |
|--------------------------------------------------|----------------------------------------------|-------------------|
| QIAmp 96 Viral RNA Kit                           | Qiagen, Hilden, Germany                      | 5262              |
| SupperScript III RT                              | Thermo Fisher Scientific, Waltham, USA       | 56575             |
| SS III First Strand 5x Buffer                    | Thermo Fisher Scientific, Waltham, USA       | Y02321            |
| Random Hexamers                                  | Thermo Fisher Scientific, Waltham, USA       | 51709             |
| Dithiothreitol                                   | Thermo Fisher Scientific, Waltham, USA       | Y00122            |
| Molecular Grade Water                            | Thermo Fisher Scientific, Waltham, USA       | Y01138            |
| Deoxynucleotide Mix                              | New England Biolabs, Ipswich, USA            | N0447S            |
| ARTIC Primer Pool 1                              | Integrated DNA Technologies, Coralville, USA | 100006786         |
| ARTIC Primer Pool 2                              | Integrated DNA Technologies, Coralville, USA | 100006787         |
| Q5 Hot Start Polymerase                          | New England Biolabs, Ipswich, USA            | M0493L            |
| Q5 5x Reaction Buffer                            | New England Biolabs, Ipswich, USA            | B90275            |
| AMPure XP                                        | Beckman Coulter, Brea, USA                   | A63882            |
| Qubit™ 1X dsDNA Kit                              | Invitrogen Corp., Waltham, USA               | Q33230            |
| Quant-iT PicoGreen Kit                           | Invitrogen Corp., Waltham, USA               | P7589             |
| IDT for Illumina DNA/RNA UD Indexes A            | Illumina Inc., San Diego, USA                | 20027213          |
| IDT for Illumina DNA/RNA UD Indexes B            | Illumina Inc., San Diego, USA                | 20027214          |
| IDT for Illumina DNA/RNA UD Indexes C            | Illumina Inc., San Diego, USA                | 20027215          |
| IDT for Illumina DNA/RNA UD Indexes D            | Illumina Inc., San Diego, USA                | 20027216          |
| Nextera XT DNA Library Preparation Kit           | Illumina Inc., San Diego, USA                | FC-131-1096       |
| NextSeq 500/550 Mid Output Kit v2.5 (150 Cycles) | Illumina Inc., San Diego, USA                | 20024904          |
| QIAmp Viral RNA mini kit                         | Qiagen, Hilden, Germany                      | 52906             |
| VetMax Xeno IPC RNA                              | Thermo Fisher Scientific, Waltham, USA       | A29763            |
| TaqPath 1 Step RT-qPCR master mix                | Thermo Fisher Scientific, Waltham, USA       | A15299            |
| VetMax Xeno VIC Assay                            | Thermo Fisher Scientific, Waltham, USA       | A29765            |
| 2019-nCov CDC EUA Kit                            | Integrated DNA Technologies, Coralville, USA | 10006713          |
