# Supplementary material for: Multiple Introductions of SARS-CoV-2 Alpha and Delta Variants into White-Tailed Deer in Pennsylvania
Source: bioRxiv or medRxiv preprint supplement (doi:10.1101/2022.02.17.22270679), 2022-05-13
Supplement: Supplementary file [file media-6.pdf]

Table S2. Results of qPCR analysis

| Lab ID # | County Location | Region | Cause of death | Date of collection | Sample type    | Species | N1 Ct        | N2 Ct        | Xeno Ct |
|----------|-----------------|--------|----------------|--------------------|----------------|---------|--------------|--------------|---------|
| 1        | Lycoming        | NCR    | HH             | 10/26/21           | nasal swab     | WTD     | Undetermined | Undetermined | 33.42   |
| 2        | Montour         | NER    | HH             | 10/26/21           | nasal swab     | WTD     | Undetermined | Undetermined | 33.79   |
| 3        | Lycoming        | NCR    | HH             | 10/26/21           | nasal swab     | WTD     | Undetermined | Undetermined | 33.27   |
| 4        | Venango         | NWR    | HH             | 10/14/21           | Nasal Swab     | WTD     | 25.60        | 26.84        | 33.59   |
| 5        | Snyder          | SCR    |                | 10/20/21           | Nasal Swab     | WTD     | Undetermined | Undetermined | 32.87   |
| 6        | Erie            | NWR    | RK             | 10/5/21            | Nasal Swab     | WTD     | 38.82        | 39.16        | 32.99   |
| 7        | Lawrence        | NWR    | RK             | 10/22/21           | Nasal Swab     | WTD     | Undetermined | Undetermined | 33.18   |
| 8        | Lawrence        | NWR    | Unknown        | 10/8/21            | Nasal Swab     | WTD     | 37.44        | 38.59        | 32.72   |
| 9        | Chester         | SER    | HH             | 10/19/21           | Nasal Swab     | WTD     | Undetermined | Undetermined | 33.33   |
| 10       | Dauphin         | SER    | HH             | 10/12/21           | Nasal Swab     | WTD     | Undetermined | Undetermined | 33.05   |
| 11       | Luzerne         | NER    | RK             | 10/28/21           | Nasal Swab     | WTD     | 15.81        | 15.29        | 32.97   |
| 12       | Luzerne         | NER    | RK             | 10/22/21           | Nasal Swab     | WTD     | 16.81        | 15.10        | 33.00   |
| 13       | Pike            | NER    | HH             | 10/22/21           | Nasal Swab     | WTD     | 36.37        | 40.16        | 32.92   |
| 14       | Pike            | NER    | HH             | 10/23/21           | Nasal Swab     | WTD     | 36.91        | 38.34        | 32.81   |
| 15       | Luzerne         | NER    | RK             | 10/20/21           | Nasal Swab     | WTD     | 38.92        | 37.59        | 32.90   |
| 16       | Pike            | NER    | HH             | 10/15/21           | Nasal Swab     | WTD     | Undetermined | Undetermined | 33.28   |
| 17       | Juniata         | SCR    | HH             | 10/20/21           | Nasal Swab 726 | WTD     | Undetermined | Undetermined | 32.85   |
| 18       | Venango         | NWR    | HH             | 10/25/21           | Nasal Swab 731 | WTD     | Undetermined | Undetermined | 33.27   |
| 19       | Crawford        | NWR    | HH             | 10/19/21           | Nasal Swab 732 | WTD     | Undetermined | Undetermined | 33.42   |
| 20       | Crawford        | NWR    | HH             | 10/2/21            | Nasal Swab 733 | WTD     | Undetermined | Undetermined | 33.02   |
| 21       | Jefferson       | NWR    | HH             | 10/18/21           | Nasal Swab 734 | WTD     | Undetermined | Undetermined | 34.79   |
| 22       | Erie            | NWR    | HH             | 11/1/21            | PBS Swab 1717  | WTD     | 19.96        | 21.98        | 33.81   |
| 23       | Crawford        | NWR    | Unknown        | 11/3/21            | PBS Swab 1719  | WTD     | Undetermined | Undetermined | 32.40   |
| 24       | Jefferson       | NWR    | Unknown        | 11/5/21            | PBS Swab 1716  | WTD     | Undetermined | Undetermined | 33.36   |
| 25       | Lancaster       | SER    | HH             | 10/6/21            | PBS Swab 2121  | WTD     | Undetermined | Undetermined | 33.25   |
| 26       | York            | SCR    | RK             | 11/6/21            | PBS Swab 2122  | WTD     | Undetermined | Undetermined | 33.22   |
| 27       | York            | SCR    | RK             | 11/6/21            | PBS Swab 2123  | WTD     | Undetermined | Undetermined | 32.92   |
| 28       | York            | SCR    | Unknown        | 11/9/21            | PBS Swab 2124  | WTD     | Undetermined | Undetermined | 32.91   |
| 29       | Lancaster       | SER    | HH             | 11/8/21            | PBS Swab 2125  | WTD     | Undetermined | Undetermined | 33.40   |
| 30       | Perry           | SCR    | Unknown        | 11/16/21           | PBS Swab 2149  | WTD     | Undetermined | Undetermined | 33.15   |
| 31       | Montgomery      | SER    | HH             | 11/21/21           | PBS Swab 2163  | WTD     | Undetermined | Undetermined | 33.19   |
| 32       | Montgomery      | SER    | RK             | 11/23/21           | PBS Swab 2335  | WTD     | Undetermined | Undetermined | 33.51   |
| 33       | Montgomery      | SER    | HH             | 11/22/21           | PBS Swab 2336  | WTD     | Undetermined | Undetermined | 33.67   |
| 34       | Columbia        | NER    | HH             | 11/5/21            | PBS Swab 2340  | WTD     | Undetermined | Undetermined | 32.99   |
| 35       | Luzerne         | NER    | RK             | 11/21/21           | PBS Swab 2341  | WTD     | Undetermined | Undetermined | 32.82   |
| 36       | Luzerne         | NER    | RK             | 11/4/21            | PBS Swab 2342  | WTD     | 29.53        | 33.84        | 33.13   |
| 37       | Lancaster       | SER    | RK             | 12/8/21            | PBS Swab 4848  | WTD     | Undetermined | Undetermined | 33.35   |
| 38       | Montgomery      | SER    | HH             | 11/22/21           | PBS Swab 2337  | WTD     | Undetermined | Undetermined | 33.44   |
| 39       | Columbia        | NER    | HH             | 11/2/21            | PBS Swab 2338  | WTD     | Undetermined | Undetermined | 33.39   |
| 40       | Wayne           | NER    | HH             | 11/6/21            | PBS Swab 2339  | WTD     | Undetermined | Undetermined | 33.07   |
| 41       | Delaware        | SER    | HH             | 12/9/21            | PBS Swab 5169  | WTD     | Undetermined | Undetermined | 33.60   |
| 42       | Bucks           | SER    | HH             | 12/4/21            | PBS Swab 5175  | WTD     | Undetermined | Undetermined | 33.62   |
| 43       | Bucks           | SER    | HH             | 12/1/21            | PBS Swab 5176  | WTD     | Undetermined | Undetermined | 32.25   |
| 44       | Bucks           | SER    | HH             | 12/2/21            | PBS Swab 5177  | WTD     | Undetermined | Undetermined | 31.96   |
| 45       | Bucks           | SER    | HH             | 12/3/21            | PBS Swab 5178  | WTD     | Undetermined | Undetermined | 31.78   |
| 46       | Bucks           | SER    | HH             | 12/5/21            | PBS Swab 5179  | WTD     | Undetermined | Undetermined | 32.23   |
| 47       | Bucks           | SER    | HH             | 12/6/21            | PBS Swab 5180  | WTD     | Undetermined | Undetermined | 32.12   |
| 48       | Delaware        | SER    | HH             | 12/9/21            | PBS Swab 5174  | WTD     | Undetermined | Undetermined | 32.08   |
| 49       | Delaware        | SER    | HH             | 12/9/21            | PBS Swab 5170  | WTD     | Undetermined | Undetermined | 31.90   |
| 50       | Delaware        | SER    | HH             | 12/9/21            | PBS Swab 5171  | WTD     | Undetermined | Undetermined | 32.91   |
| 51       | Delaware        | SER    | HH             | 12/9/21            | PBS Swab 5173  | WTD     | Undetermined | Undetermined | 32.79   |
| 52       | Delaware        | SER    | HH             | 12/9/21            | PBS Swab 5172  | WTD     | 35.60        | 36.83        | 32.78   |
| 53       | Jefferson       | NWR    | HH             | 12/2/21            | PBS Swab 6063  | WTD     | Undetermined | Undetermined | 33.22   |
| 54       | Lebanon         | SER    | HH             | 12/15/21           | PBS Swab 6144  | WTD     | Undetermined | Undetermined | 33.19   |
| 55       | Jefferson       | NWR    | Unknown        | 12/2/21            | PBS Swab 6025  | WTD     | Undetermined | Undetermined | 32.71   |
| 56       | Venango         | NWR    | HH             | 12/9/21            | PBS Swab 6023  | WTD     | Undetermined | Undetermined | 32.64   |
| 57       | Venango         | NWR    | HH             | 12/8/21            | PBS Swab 6024  | WTD     | Undetermined | Undetermined | 32.33   |
| 58       | Clearfield      | NCR    | HH             | 12/2/21            | PBS Swab 6022  | WTD     | Undetermined | Undetermined | 33.49   |
| 59       | Bedford         | SCR    | HH             | 12/9/21            | PBS Swab 6204  | WTD     | Undetermined | Undetermined | 32.88   |
| 60       | Lycoming        | NCR    | HH             | 12/13/21           | PBS Swab 5181  | WTD     | Undetermined | Undetermined | 34.05   |
| 61       | Lancaster       | SER    | HH             | 12/3/21            | PBS Swab 6203  | WTD     | Undetermined | Undetermined | 34.15   |
| 62       | Lancaster       | SER    | HH             | 12/15/21           | PBS Swab 6145  | WTD     | Undetermined | Undetermined | 33.03   |
| 63       | Blair           | SCR    | Unknown        | 11/30/21           | PBS Swab 6198  | WTD     | Undetermined | Undetermined | 33.19   |
| 64       | Blair           | SCR    | Unknown        | 11/30/21           | PBS Swab 6199  | WTD     | Undetermined | Undetermined | 31.63   |
| 65       | Bedford         | SCR    | HH             | 12/2/21            | PBS Swab 6202  | WTD     | Undetermined | Undetermined | 33.01   |
| 66       | Huntingdon      | SCR    | HH             | 12/1/21            | PBS Swab 6205  | WTD     | Undetermined | Undetermined | 31.90   |
| 67       | Mifflin         | SCR    | HH             | 12/3/21            | PBS Swab 6206  | WTD     | Undetermined | Undetermined | 31.75   |
| 68       | Juniata         | SCR    | blank          | 11/19/21           | PBS Swab 6207  | WTD     | Undetermined | Undetermined | 31.76   |
| 69       | York            | SCR    | RK             | 11/19/21           | PBS Swab 6209  | WTD     | 38.39        | 41.05        | 32.70   |
| 70       | Huntingdon      | SCR    | HH             | 11/29/21           | PBS Swab 6210  | WTD     | 34.19        | 35.14        | 32.05   |
| 71       | York            | SCR    | Unknown        | 11/19/21           | PBS Swab 6212  | WTD     | Undetermined | Undetermined | 32.34   |
| 72       | York            | SCR    | Unknown        | 11/16/21           | PBS Swab 6213  | WTD     | Undetermined | Undetermined | 32.47   |
| 73       | Bedford         | SCR    | HH             | 11/29/21           | PBS Swab 6216  | WTD     | Undetermined | Undetermined | 32.48   |
| 74       | Huntingdon      | SCR    | HH             | 11/30/21           | PBS Swab 6214  | WTD     | Undetermined | Undetermined | 32.48   |

|    |            |     |         |          |               |     |              |              |       |
|----|------------|-----|---------|----------|---------------|-----|--------------|--------------|-------|
| 75 | Huntingdon | SCR | HH      | 11/28/21 | PBS Swab 6211 | WTD | Undetermined | Undetermined | 32.47 |
| 76 | Huntingdon | SCR | HH      | 11/27/21 | PBS Swab 6208 | WTD | Undetermined | Undetermined | 32.43 |
| 77 | Mifflin    | SCR | HH      | 11/30/21 | PBS Swab 6215 | WTD | Undetermined | Undetermined | 32.73 |
| 78 | Sullivan   | NER | HH      | 12/4/21  | PBS Swab 0064 | WTD | Undetermined | Undetermined | 32.31 |
| 79 | Luzerne    | NER | RK      | 12/27/21 | PBS Swab 0065 | WTD | Undetermined | Undetermined | 32.65 |
| 80 | Wayne      | NER | HH      | 11/28/21 | PBS Swab 0066 | WTD | Undetermined | Undetermined | 32.30 |
| 81 | Sullivan   | NER | HH      | 12/7/21  | PBS Swab 0067 | WTD | Undetermined | Undetermined | 32.37 |
| 82 | Columbia   | NER | HH      | 12/3/21  | PBS Swab 0068 | WTD | Undetermined | Undetermined | 32.39 |
| 83 | Luzerne    | NER | Unknown | 12/3/21  | PBS Swab 4266 | WTD | Undetermined | Undetermined | 32.95 |
| 84 | Luzerne    | NER | Unknown | 12/3/21  | PBS Swab 0070 | WTD | Undetermined | Undetermined | 33.99 |
| 85 | Bradford   | NER | HH      | 12/3/21  | PBS Swab 0071 | WTD | Undetermined | Undetermined | 33.08 |
| 86 | Pike       | NER | HH      | 11/27/21 | PBS Swab 0072 | WTD | Undetermined | Undetermined | 33.22 |
| 87 | Wayne      | NER | HH      | 11/27/21 | PBS Swab 0073 | WTD | 24.42        | 26.96        | 32.89 |
| 88 | Wayne      | NER | HH      | 11/27/21 | PBS Swab 0074 | WTD | 36.98        | 37.94        | 32.94 |
| 89 | Pike       | NER | HH      | 11/29/21 | PBS Swab 0075 | WTD | 35.56        | 39.41        | 33.31 |
| 90 | Centre     | SER | HH      | 11/29/21 | PBS Swab 0076 | WTD | Undetermined | Undetermined | 33.44 |
| 91 | Monroe     | NER | HH      | 11/27/21 | PBS Swab 0077 | WTD | 17.14        | 19.18        | 33.51 |
| 92 | Monroe     | NER | HH      | 11/27/21 | PBS Swab 0078 | WTD | Undetermined | Undetermined | 32.93 |
| 93 | Monroe     | NER | HH      | 11/28/21 | PBS Swab 0079 | WTD | 21.69        | 23.89        | 33.20 |
