# Supplementary material for: Multiple Introductions of SARS-CoV-2 Alpha and Delta Variants into White-Tailed Deer in Pennsylvania
Source: bioRxiv or medRxiv preprint supplement (doi:10.1101/2022.02.17.22270679), 2022-05-13
Supplement: Supplementary file [file media-7.pdf]

Table S1. SARS-CoV-2 prevalence estimates stratified by gender, age, and sampling region

| Sample information | Samples  | Positives | Estimated Prevalence            |
|--------------------|----------|-----------|---------------------------------|
| <b>Gender</b>      | Female   | 40        | 35%<br>(95% CI: 22.13, 50.5)    |
|                    | Male     | 53        | 7.50%<br>(95% CI: 2.97, 17.9)   |
| <b>Age</b>         | Fawn     | 10        | 10%<br>(95% CI: 1.79, 40.4)     |
|                    | Yearling | 16        | 6.20%<br>(95% CI: 1.11, 28.33)  |
|                    | Adult    | 65        | 23%<br>(95% CI: 14.51, 34.6)    |
|                    | Unknown  | 2         | NA                              |
| <b>Region</b>      | NER      | 27        | 40.70%<br>(95% CI: 24.51, 59.3) |
|                    | NCR      | 4         | 0%<br>(95% CI: 0, 0.49)         |
|                    | NWR      | 15        | 26.70%<br>(95% CI: 10.9, 51.9)  |
|                    | SER      | 26        | 3.80%<br>(95% CI: 0.68, 18.9)   |
|                    | SCR      | 21        | 9.50%<br>(95% CI: 14.51, 34.6)  |
|                    | SWR      | 0         | 0                               |
